# Supplementary material for: Spatial inter-centromeric interactions facilitated the emergence of evolutionary new centromeres
Source: eLife. 2020 May 29;9:e58556. doi: 10.7554/eLife.58556 (PMC7292649; doi:10.7554/eLife.58556)
Supplement: Source data 1. [file elife-58556-data1.xlsx]

## Sheet: Figure 1—figure supplement 2B
Chr1_Ctrl	contig12	contig13	contig14	contig15	contig16
219.625	116.272	16.1489	0	240.619	169.564
259.998	156.645	143.725	6.45957	272.917	250.308
266.457	161.489	155.03	12.9191	289.066	284.221
271.302	176.023	159.874	38.7574	318.134	337.513
297.14	201.862	179.253	40.3723	363.351	342.357
306.83	216.396	188.943	46.8319	397.264	361.736
311.674	266.457	193.787	51.6766	421.487	382.73
321.364	284.221	197.017	54.9064	439.251	408.568
332.668	421.487	208.321	62.9808	455.4	458.63
334.283	429.562	227.7	72.6702	484.468	479.623
343.972	463.474	263.228	100.123	499.002	545.834
350.432	471.549	324.594	121.117	526.455	607.2
356.891	478.008	339.128	124.347	566.828	704.093
361.736	515.151	347.202	140.496	597.51	747.696
371.425	528.07	350.432	177.638	628.193	763.844
540.989	544.219	363.351	255.153	636.268	767.074
574.902	571.672	374.655	280.991	691.174	792.913
584.591	621.734	382.73	290.681	713.783	817.136
599.125	658.876	395.649	322.979	717.013	828.44
676.64	687.944	400.494	334.283	731.547	847.819
683.1	697.634	405.338	350.432	804.217	862.353
691.174	712.168	434.406	495.772	820.366	918.874
696.019	728.317	439.251	507.076	828.44	968.936
707.323	731.547	448.94	526.455	851.049	973.781
710.553	744.466	468.319	536.145	981.855	996.389
713.783	760.615	478.008	560.368	1031.92	1015.77
725.087	770.304	507.076	570.057	1046.45	1023.84
729.932	792.913	521.611	573.287	1094.9	1025.46
750.925	817.136	612.045	581.362	1112.66	1033.53
781.608	922.104	618.504	592.666	1162.72	1185.33
796.142	941.483	620.119	618.504	1193.41	1191.79
804.217	960.861	634.653	639.498	1203.1	1207.94
831.67	983.47	684.715	663.721	1235.39	1249.93
846.204	986.7	689.559	671.796	1266.08	1270.92
859.123	1036.76	692.789	683.1	1280.61	1301.6
863.968	1165.95	705.708	696.019	1290.3	1333.9
884.961	1329.06	712.168	713.783	1306.45	1348.44
891.421	1351.67	715.398	721.857	1327.44	1371.04
907.57	1409.8	707.323	765.459	1500.24	1406.57
926.949	1424.34	708.938	781.608	1589.05	1413.03
941.483	1458.25	705.708	788.068	1608.43	1442.1
938.253	1459.86	726.702	800.987	1618.12	1446.94
972.166	1467.94	649.187	820.366	1614.89	1450.17
967.321	1479.24	671.796	860.738	1642.35	1647.19
1157.88	1493.78	675.025	889.806	1797.38	1663.34
1140.11	1495.39	673.41	946.327	1719.86	1685.95
1164.34	1516.38	663.721	1031.92	1685.95	1694.02
1154.65	1503.47	662.106	1044.84	1681.1	1711.79
1186.95	1506.7	668.566	1072.29	1673.03	1658.5
1195.02	1493.78	649.187	1080.36	1642.35	1905.57
1081.98	1500.24	642.727	1117.51	1626.2	1884.58
1122.35	1474.4	665.336	1138.5	1624.58	1897.5
1141.73	1469.55	663.721	1222.47	1556.76	1915.26
1148.19	1477.63	658.876	1259.62	1547.07	1881.35
1175.64	1501.85	657.262	1293.53	1514.77	1910.42
1216.01	1493.78	660.491	1306.45	1501.85	1950.79
1282.23	1661.73	657.262	1287.07	1519.61	1939.49
1298.37	1614.89	654.032	1359.74	1513.15	1928.18
1304.83	1584.21	636.268	1387.19	1501.85	1920.11
1295.14	1524.46	584.591	1401.73	1498.62	1874.89
1314.52	1518	574.902	1413.03	1574.52	1871.66
1327.44	1519.61	566.828	1393.65	1550.3	1852.28
1346.82	1677.87	565.213	1471.17	1774.77	1839.36
1350.05	1676.26	561.983	1469.55	1758.62	1753.77
1379.12	1682.72	553.908	1471.17	1748.93	1705.33
1217.63	1664.95	615.274	1461.48	1724.71	1747.31
1196.64	1690.79	618.504	1734.4	1737.63	1760.23
1193.41	1671.41	615.274	1763.46	1721.48	1870.05
1258	1658.5	586.206	1726.32	1711.79	1886.2
1211.17	1624.58	612.045	1731.17	1698.87	1900.73
1238.62	1614.89	628.193	1732.78	1697.25	1955.64
1237.01	1650.42	613.659	1724.71	1705.33	1910.42
1249.93	1647.19	620.119	1576.14	1724.71	1903.96
1253.16	1645.58	637.883	2435.26	1685.95	1863.59
1270.92	1690.79	642.727	2449.79	1682.72	1899.11
1277.38	1689.18	650.802	2465.94	1650.42	1908.8
1274.15	1731.17	671.796	2482.09	1606.82	1897.5
1279	1719.86	686.33	2498.24	1580.98	1910.42
1338.75	1727.94	689.559	2516	1577.75	1931.41
1306.45	1734.4	649.187	2525.69	1556.76	1937.87
1308.06	1664.95	666.951	2519.23	1550.3	1819.98
1303.22	1669.8	673.41	2524.08	1553.53	1818.37
1304.83	1682.72	676.64	2593.52	1566.45	1842.59
1419.49	1694.02	666.951	2661.34	1585.83	1802.22
1451.79	1748.93	660.491	2685.57	1569.68	1824.83
1509.93	1692.41	666.951	2683.95	1559.99	1800.61
1530.92	1600.36	665.336	2677.49	1364.58	1805.45
1548.68	1484.09	655.647	2675.88	1346.82	1794.15
1626.2	1455.02	654.032	2661.34	1356.51	1773.15
1621.35	1493.78	652.417	2664.57	1343.59	1761.85
1614.89	1498.62	644.342	2677.49	1338.75	1794.15
1639.12	1487.32	628.193	2675.88	1159.49	1769.92
1622.97	1492.16	624.964	2630.66	1153.03	1768.31
1610.05	1497.01	637.883	2629.05	1162.72	1685.95
1448.56	1500.24	642.727	2599.98	1165.95	1653.65
1445.33	1501.85	641.113	2567.68	1177.26	1637.5
1427.57	1509.93	647.572	2559.61	1175.64	1610.05
1458.25	1503.47	644.342	2578.98	1172.41	1600.36
1419.49	1513.15	654.032	2559.61	1175.64	1448.56
1409.8	1545.45	665.336	2549.92	1183.72	1443.71
1372.66	1556.76	675.025	2570.91	1186.95	1442.1
1406.57	1577.75	655.647	2533.77	1196.64	1429.18
1424.34	1703.71	671.796	2524.08	1206.33	1414.65
1438.87	1692.41	678.255	2516	1203.1	1408.19
1430.8	1716.63	686.33	2569.3	1233.78	1367.81
1366.2	1769.92	670.181	2588.67	1228.93	1353.28
1322.6	1748.93	668.566	2511.16	1222.47	1432.41
1306.45	1579.37	665.336	2546.69	1216.01	1443.71
1322.6	1590.67	666.951	2651.65	1209.56	1477.63
1327.44	1589.05	663.721	2637.12	1156.26	1450.17
1340.36	1603.59	671.796	2708.18	1062.6	1458.25
1369.43	1593.9	663.721	2713.02	884.961	1492.16
1435.64	1587.44	678.255	2612.9	872.042	1511.54
1422.72	1687.56	715.398	2638.74	957.632	1537.38
1409.8	1685.95	678.255	2629.05	962.476	1592.28
1413.03	1669.8	684.715	2588.67	952.787	1545.45
1411.42	1660.11	681.485	2130.04	954.402	1526.07
1430.8	1684.33	629.808	2155.88	993.159	1467.94
1362.97	1689.18	642.727	2352.9	1090.05	1488.93
1348.44	1698.87	645.957	2365.82	1086.82	1446.94
1350.05	1719.86	631.423	2373.89	1007.69	1463.09
1351.67	1737.63	602.355	2356.13	980.24	1477.63
1330.67	1742.47	463.474	2335.14	999.619	1485.7
1385.58	1755.39	457.015	1702.1	1004.46	1477.63
1392.04	1732.78	453.785	1685.95	1059.37	1488.93
1374.27	1745.7	455.4	1697.25	1075.52	1500.24
1611.66	1748.93	453.785	1673.03	1080.36	1524.46
1592.28	1736.01	437.636	1753.77	1051.3	1526.07
1550.3	1744.08	474.779	1760.23	1012.54	1518
1571.29	1748.93	473.164	1753.77	993.159	1524.46
1592.28	1771.54	471.549	1773.15	1001.23	1543.84
1601.97	1726.32	474.779	1750.54	993.159	1524.46
1618.12	2046.07	469.934	1732.78	1027.07	1500.24
1622.97	2060.6	478.008	1671.41	1041.61	1527.69
1521.23	2063.83	469.934	1731.17	1031.92	1543.84
1467.94	2017	466.704	1740.85	1035.15	1542.22
1643.96	2020.23	476.393	1761.85	994.774	1551.91
1621.35	2021.85	532.915	1795.76	991.544	1555.14
1540.61	2042.84	534.53	1824.83	1004.46	1542.22
1555.14	1931.41	523.225	1836.13	972.166	1485.7
1564.83	1934.64	524.84	1829.67	964.091	1482.47
1532.53	1931.41	519.996	1815.14	965.706	1511.54
1540.61	1905.57	550.679	1858.74	977.01	1584.21
1532.53	1882.97	540.989	1860.36	1002.85	1690.79
1543.84	1887.81	549.064	1837.75	1070.67	1682.72
1634.27	1899.11	558.753	1849.05	1078.75	1621.35
1598.74	1897.5	550.679	1855.51	1075.52	1616.51
1600.36	1916.88	549.064	1857.13	1081.98	1610.05
1677.87	1886.2	536.145	1881.35	1094.9	1611.66
1778	1768.31	678.255	1861.97	1088.44	1619.74
1718.25	1736.01	675.025	1858.74	1112.66	1660.11
1721.48	1752.16	694.404	1819.98	1117.51	1643.96
1700.48	1758.62	705.708	1860.36	1128.81	1622.97
1721.48	1729.55	704.093	1855.51	1112.66	1566.45
1760.23	1648.81	710.553	1821.6	1096.51	1568.06
1773.15	1635.89	720.242	1774.77	1114.28	1555.14
1789.3	1627.81	726.702	1876.51	1090.05	1690.79
1787.69	1610.05	729.932	1853.9	1104.59	1681.1
1773.15	1603.59	728.317	1824.83	1101.36	1608.43
1800.61	1577.75	715.398	1732.78	1093.28	1585.83
1776.38	1579.37	702.479	1736.01	1083.59	1643.96
1729.55	1288.68	670.181	1664.95	1056.14	1585.83
1748.93	1287.07	671.796	1671.41	1062.6	1592.28
1744.08	1658.5	673.41	1655.27	1038.38	1622.97
1719.86	1637.5	678.255	1653.65	1004.46	1574.52
1865.2	1611.66	676.64	1702.1	985.085	1576.14
1858.74	1624.58	687.944	1685.95	970.551	1537.38
1863.59	1645.58	670.181	1676.26	978.625	1545.45
1865.2	1626.2	678.255	1482.47	968.936	1524.46
1879.74	1629.43	675.025	1488.93	1025.46	1522.84
1937.87	1595.51	676.64	1493.78	977.01	1480.86
1965.33	1653.65	692.789	1506.7	960.861	1482.47
1915.26	1655.27	675.025	1490.55	951.172	1521.23
2004.08	1676.26	681.485	1493.78	968.936	1534.15
1823.21	1655.27	687.944	1471.17	897.881	1545.45
1881.35	1681.1	699.249	1501.85	901.11	1553.53
1907.19	1645.58	660.491	1485.7	904.34	1564.83
1900.73	1619.74	684.715	1401.73	909.185	1577.75
1889.43	1587.44	700.864	1387.19	905.955	1553.53
1910.42	1569.68	697.634	1429.18	915.644	1543.84
1942.72	1253.16	699.249	1425.95	936.638	1518
1950.79	1283.84	708.938	1379.12	909.185	1540.61
1976.63	1269.31	715.398	1264.46	915.644	1516.38
1891.04	1283.84	773.534	1345.21	897.881	1534.15
1852.28	1299.99	708.938	1350.05	884.961	1553.53
1834.52	1308.06	744.466	1348.44	943.098	1556.76
1828.06	1274.15	747.696	1490.55	993.159	1545.45
1818.37	1285.45	757.385	1466.32	1014.15	1574.52
1832.9	1282.23	749.31	1450.17	1019	1619.74
1850.67	1280.61	738.006	1469.55	1044.84	1608.43
1887.81	1282.23	723.472	1501.85	991.544	1555.14
1871.66	1353.28	721.857	1508.31	1009.31	1417.88
2097.75	1362.97	725.087	1484.09	993.159	1480.86
2046.07	1340.36	718.627	1482.47	991.544	1538.99
2054.14	1455.02	721.857	1480.86	907.57	1559.99
2062.22	1440.48	713.783	1466.32	989.93	1569.68
2008.93	1380.73	710.553	1471.17	1001.23	1556.76
1924.95	1398.5	589.436	1479.24	996.389	1547.07
2012.16	1411.42	610.43	1438.87	1004.46	1571.29
2031.54	1419.49	599.125	1446.94	1019	1559.99
2034.77	1395.27	600.74	1430.8	1033.53	1571.29
2015.39	1382.35	594.281	1424.34	1028.69	1550.3
2023.46	1388.81	605.585	1361.35	1088.44	1601.97
1976.63	1390.42	595.896	1424.34	1093.28	1589.05
1987.93	1387.19	597.51	1453.4	1098.13	1451.79
2000.85	1393.65	595.896	1377.5	1170.8	1472.78
2017	1419.49	591.051	1385.58	1266.08	1477.63
1999.24	1429.18	584.591	1393.65	1270.92	1437.25
1944.33	1434.03	620.119	1380.73	1309.68	1416.26
1966.94	1400.11	621.734	1375.89	1311.29	1419.49
2197.87	1388.81	633.038	1448.56	1324.21	1401.73
2225.32	1379.12	629.808	1461.48	1354.9	1358.13
2212.4	1052.91	673.41	1479.24	1343.59	1385.58
2230.17	1159.49	670.181	1455.02	1350.05	1388.81
2055.76	1183.72	665.336	1416.26	1366.2	1396.88
2084.83	1209.56	658.876	1417.88	1356.51	1401.73
2068.68	1090.05	662.106	1396.88	1377.5	1398.5
2058.99	1182.1	660.491	1409.8	1390.42	1456.63
2000.85	1183.72	652.417	1393.65	1400.11	1434.03
1987.93	1112.66	650.802	1411.42	1317.75	1438.87
2154.27	1086.82	665.336	1414.65	1325.83	1422.72
2107.44	1075.52	681.485	1413.03	1361.35	1409.8
2120.35	1060.98	679.87	1434.03	1364.58	1383.96
2065.45	1044.84	668.566	1421.11	1374.27	1359.74
2038	1059.37	676.64	1417.88	1480.86	1351.67
1954.02	1060.98	684.715	1556.76	1477.63	1361.35
1950.79	1059.37	679.87	1538.99	1547.07	1359.74
1920.11	1072.29	683.1	1548.68	1548.68	1382.35
1897.5	965.706	687.944	1443.71	1555.14	1364.58
1842.59	949.557	676.64	1345.21	1540.61	1400.11
1819.98	1020.61	681.485	1330.67	1514.77	1371.04
1897.5	1014.15	660.491	1345.21	1568.06	1366.2
1868.43	998.004	603.97	1353.28	1572.91	1337.13
1831.29	1033.53	571.672	1327.44	1605.2	1382.35
1823.21	1030.3	581.362	1320.98	1598.74	1343.59
1815.14	1027.07	579.747	1287.07	1577.75	1359.74
1811.91	1030.3	574.902	1280.61	1569.68	1417.88
1797.38	1048.07	576.517	1316.14	1555.14	1406.57
1824.83	1064.21	578.132	1308.06	1532.53	1372.66
1794.15	968.936	570.057	1306.45	1561.6	1320.98
1803.84	964.091	568.442	1333.9	1566.45	1306.45
1795.76	972.166	542.604	1346.82	1556.76	1317.75
1622.97	893.036	550.679	1329.06	1540.61	1285.45
1558.37	899.496	549.064	1337.13	1547.07	1356.51
1563.22	914.03	547.449	1345.21	1553.53	1354.9
1556.76	917.259	586.206	1351.67	1474.4	1382.35
1551.91	907.57	658.876	1348.44	1469.55	1330.67
1547.07	960.861	631.423	1340.36	1467.94	1466.32
1543.84	962.476	626.579	1312.91	1508.31	1474.4
1438.87	981.855	631.423	1296.76	1488.93	1480.86
1435.64	989.93	634.653	1311.29	1542.22	1464.71
1455.02	980.24	629.808	1314.52	1543.84	1437.25
1443.71	996.389	615.274	1312.91	1471.17	1505.08
1455.02	1030.3	618.504	1290.3	1463.09	1498.62
1451.79	1038.38	615.274	1295.14	1476.01	1503.47
1482.47	1022.23	621.734	1280.61	1367.81	1488.93
1474.4	1027.07	628.193	1214.4	1377.5	1501.85
1455.02	1035.15	639.498	1227.32	1416.26	1487.32
1469.55	1049.68	594.281	1249.93	1383.96	1469.55
1526.07	1075.52	589.436	1264.46	1396.88	1467.94
1530.92	1077.13	574.902	1267.69	1411.42	1466.32
1253.16	1086.82	563.598	1279	1406.57	1446.94
1283.84	1096.51	560.368	1277.38	1396.88	1434.03
1266.08	983.47	502.232	1291.91	1508.31	1422.72
1291.91	993.159	500.617	1269.31	1500.24	1404.96
1299.99	1219.24	499.002	1295.14	1490.55	1396.88
1285.45	1169.18	497.387	1369.43	1487.32	1401.73
1274.15	1193.41	495.772	1343.59	1467.94	1362.97
1283.84	1232.16	508.691	1348.44	1450.17	1337.13
1262.85	1238.62	505.462	1327.44	1443.71	1348.44
1146.57	1249.93	489.313	1325.83	1422.72	1335.52
1183.72	1261.23	479.623	1322.6	1443.71	1374.27
1167.57	1291.91	542.604	1303.22	1432.41	1337.13
1157.88	1295.14	566.828	1225.7	1416.26	1330.67
1154.65	1279	558.753	1259.62	1338.75	1338.75
1133.66	1280.61	536.145	1238.62	1458.25	1343.59
1138.5	1272.54	528.07	1225.7	1396.88	1341.98
1201.48	1269.31	526.455	1204.71	1424.34	1308.06
1209.56	1256.39	524.84	1216.01	1403.34	1288.68
1366.2	1258	526.455	1201.48	1442.1	1259.62
1492.16	1241.85	539.374	1214.4	1455.02	1240.24
1443.71	1175.64	540.989	1190.18	1421.11	1245.08
1437.25	1178.87	532.915	1195.02	1403.34	1217.63
1414.65	1148.19	528.07	1191.79	1392.04	1212.78
1453.4	1138.5	524.84	1198.25	1408.19	1195.02
1472.78	1165.95	523.225	1161.11	1354.9	1204.71
1551.91	1178.87	539.374	1175.64	1346.82	1144.96
1566.45	1148.19	537.759	1154.65	1333.9	1130.43
1577.75	1143.34	553.908	1122.35	1320.98	1180.49
1548.68	1146.57	555.523	1133.66	1299.99	1138.5
1705.33	1133.66	542.604	1132.04	1295.14	1136.88
1676.26	1125.58	552.293	1115.89	1303.22	1120.74
1656.88	1115.89	540.989	1112.66	1306.45	1104.59
1640.73	1091.67	442.481	1098.13	1340.36	1027.07
1614.89	1086.82	418.257	1101.36	1332.29	1014.15
1611.66	1112.66	426.332	1104.59	1316.14	889.806
1619.74	1120.74	427.947	1091.67	1324.21	891.421
1613.28	1169.18	421.487	1083.59	1269.31	867.198
1603.59	1206.33	410.183	1044.84	1227.32	868.813
1637.5	1211.17	523.225	1072.29	1232.16	842.974
1642.35	1224.09	561.983	1057.76	1246.7	852.664
1663.34	1237.01	558.753	1048.07	1274.15	815.521
1648.81	1225.7	557.138	1039.99	1266.08	847.819
1645.58	1195.02	550.679	1031.92	1241.85	820.366
1639.12	1212.78	558.753	1002.85	1222.47	812.291
1642.35	1204.71	550.679	954.402	1175.64	800.987
1635.89	1183.72	570.057	935.023	1130.43	910.8
1608.43	1172.41	582.976	1060.98	1138.5	918.874
1600.36	1138.5	579.747	1014.15	1167.57	917.259
1529.3	1140.11	584.591	1017.38	1141.73	915.644
1576.14	1051.3	628.193	1002.85	1128.81	917.259
1556.76	1048.07	670.181	1025.46	1038.38	904.34
1548.68	897.881	676.64	1027.07	1085.21	947.942
1524.46	915.644	673.41	994.774	1119.12	965.706
1526.07	938.253	700.864	938.253	1111.05	1023.84
1521.23	918.874	702.479	925.334	1106.2	1006.08
1511.54	886.576	708.938	956.017	1101.36	986.7
1509.93	901.11	702.479	954.402	1094.9	957.632
1476.01	893.036	645.957	983.47	1101.36	980.24
1474.4	844.589	615.274	1010.92	1075.52	926.949
1488.93	839.744	639.498	994.774	1083.59	931.793
1497.01	846.204	633.038	959.247	1080.36	928.564
1501.85	841.359	631.423	956.017	1093.28	925.334
1445.33	831.67	641.113	936.638	930.178	922.104
1476.01	823.596	634.653	935.023	928.564	939.868
1559.99	818.751	629.808	1006.08	956.017	960.861
1548.68	828.44	612.045	1112.66	960.861	951.172
1341.98	834.9	615.274	1099.74	904.34	957.632
1253.16	854.278	613.659	1101.36	968.936	972.166
1245.08	852.664	616.889	1130.43	985.085	959.247
1241.85	854.278	621.734	1149.8	986.7	943.098
1240.24	857.508	618.504	1174.03	989.93	946.327
1235.39	872.042	623.349	1159.49	967.321	944.713
1508.31	855.893	599.125	1164.34	964.091	923.719
1513.15	846.204	581.362	1191.79	967.321	960.861
1518	842.974	570.057	1209.56	973.781	964.091
1501.85	880.117	573.287	1261.23	977.01	918.874
1516.38	889.806	574.902	1267.69	973.781	904.34
1345.21	901.11	582.976	1295.14	989.93	896.266
1361.35	915.644	566.828	1277.38	988.315	888.191
1367.81	923.719	563.598	1274.15	981.855	894.651
1369.43	939.868	639.498	1277.38	933.408	905.955
1380.73	930.178	652.417	1325.83	935.023	904.34
1379.12	909.185	718.627	1317.75	936.638	901.11
1395.27	834.9	738.006	1314.52	959.247	889.806
1448.56	876.887	815.521	1319.37	960.861	876.887
1432.41	820.366	821.981	1324.21	935.023	854.278
1417.88	802.602	710.553	1320.98	909.185	849.434
1409.8	778.379	694.404	1332.29	896.266	842.974
1382.35	789.683	712.168	1372.66	954.402	844.589
1435.64	794.527	710.553	1406.57	957.632	839.744
1430.8	776.764	715.398	1424.34	960.861	815.521
1432.41	779.993	720.242	1445.33	946.327	809.061
1424.34	776.764	702.479	1456.63	943.098	799.372
1437.25	781.608	707.323	1467.94	933.408	788.068
1455.02	779.993	708.938	1692.41	889.806	683.1
1417.88	788.068	707.323	1758.62	894.651	700.864
1416.26	781.608	665.336	1784.46	865.583	710.553
1414.65	771.919	636.268	1679.49	873.657	705.708
1450.17	754.155	673.41	1681.1	805.832	702.479
1421.11	746.081	702.479	1664.95	807.447	707.323
1419.49	742.851	704.093	1645.58	799.372	652.417
1413.03	744.466	697.634	1656.88	797.757	637.883
1411.42	720.242	704.093	1655.27	792.913	618.504
1429.18	718.627	670.181	1645.58	796.142	626.579
1424.34	699.249	683.1	1642.35	771.919	621.734
1461.48	702.479	678.255	1648.81	817.136	629.808
1453.4	700.864	683.1	1627.81	809.061	612.045
1464.71	715.398	652.417	1622.97	797.757	647.572
1476.01	733.162	684.715	1592.28	789.683	642.727
1479.24	797.757	700.864	1568.06	818.751	637.883
1461.48	804.217	697.634	1564.83	807.447	629.808
1434.03	807.447	702.479	1589.05	746.081	624.964
1414.65	794.527	726.702	1571.29	747.696	607.2
1383.96	802.602	739.621	1579.37	687.944	578.132
1396.88	810.676	750.925	1569.68	654.032	597.51
1461.48	807.447	763.844	1508.31	652.417	595.896
1476.01	804.217	765.459	1413.03	666.951	582.976
1477.63	800.987	775.149	1425.95	641.113	574.902
1461.48	797.757	776.764	1371.04	683.1	697.634
1485.7	789.683	778.379	1354.9	681.485	694.404
1350.05	810.676	779.993	1335.52	687.944	699.249
1217.63	802.602	792.913	1319.37	679.87	700.864
1177.26	783.223	794.527	1311.29	670.181	655.647
1172.41	776.764	809.061	1306.45	687.944	673.41
1153.03	773.534	817.136	1256.39	683.1	679.87
1203.1	768.689	818.751	1237.01	673.41	691.174
1190.18	762.23	821.981	1191.79	686.33	681.485
1193.41	775.149	823.596	1133.66	681.485	702.479
1298.37	771.919	833.285	1135.27	725.087	710.553
1332.29	741.236	752.54	1127.2	718.627	705.708
1343.59	713.783	778.379	1123.97	725.087	699.249
1346.82	771.919	707.323	1081.98	718.627	696.019
1327.44	775.149	700.864	1186.95	694.404	699.249
1351.67	791.298	678.255	1195.02	689.559	694.404
1346.82	794.527	679.87	1191.79	686.33	691.174
1351.67	799.372	681.485	1180.49	613.659	689.559
1299.99	831.67	668.566	1186.95	633.038	691.174
1322.6	826.825	713.783	1157.88	620.119	684.715
1356.51	851.049	694.404	1083.59	636.268	704.093
1383.96	844.589	736.391	1157.88	639.498	689.559
1417.88	809.061	794.527	1133.66	641.113	678.255
1387.19	836.515	789.683	1119.12	639.498	686.33
1395.27	857.508	809.061	1093.28	641.113	708.938
1408.19	846.204	797.757	1122.35	649.187	704.093
1401.73	860.738	813.906	834.9	650.802	696.019
1425.95	873.657	820.366	797.757	696.019	717.013
1416.26	918.874	818.751	799.372	702.479	779.993
1459.86	925.334	810.676	810.676	694.404	784.838
1508.31	917.259	760.615	802.602	718.627	797.757
1519.61	933.408	765.459	794.527	728.317	807.447
1521.23	951.172	791.298	863.968	817.136	799.372
1514.77	960.861	796.142	828.44	870.427	802.602
1553.53	968.936	788.068	839.744	867.198	792.913
1571.29	959.247	797.757	817.136	865.583	786.453
1521.23	915.644	800.987	872.042	799.372	789.683
1529.3	846.204	807.447	905.955	804.217	750.925
2217.25	873.657	805.832	897.881	831.67	762.23
2246.32	875.272	791.298	909.185	805.832	754.155
2241.47	884.961	789.683	901.11	788.068	804.217
2220.48	910.8	838.13	907.57	786.453	809.061
2197.87	918.874	833.285	899.496	784.838	852.664
2160.73	909.185	825.21	889.806	776.764	855.893
2142.96	914.03	797.757	899.496	791.298	860.738
2062.22	956.017	799.372	889.806	767.074	872.042
2081.6	999.619	796.142	901.11	759	870.427
2083.21	994.774	799.372	910.8	754.155	852.664
2078.37	1022.23	802.602	912.415	733.162	773.534
2070.29	1015.77	805.832	905.955	713.783	776.764
2029.92	1023.84	796.142	912.415	718.627	802.602
2036.38	998.004	799.372	915.644	731.547	791.298
2017	1020.61	800.987	922.104	733.162	786.453
1976.63	1002.85	786.453	939.868	738.006	788.068
1966.94	1017.38	799.372	957.632	717.013	750.925
1958.87	1007.69	786.453	968.936	694.404	746.081
1918.49	980.24	775.149	986.7	678.255	750.925
1915.26	994.774	765.459	991.544	673.41	752.54
1900.73	985.085	763.844	1001.23	662.106	739.621
1794.15	1028.69	760.615	1012.54	645.957	744.466
1740.85	1036.76	752.54	1019	734.776	746.081
1724.71	1015.77	726.702	1033.53	733.162	742.851
1711.79	988.315	717.013	1036.76	752.54	739.621
1698.87	967.321	725.087	936.638	750.925	741.236
1674.64	1010.92	676.64	926.949	768.689	739.621
1637.5	988.315	663.721	939.868	771.919	736.391
1813.53	993.159	831.67	936.638	767.074	881.732
1787.69	1002.85	833.285	946.327	760.615	863.968
1789.3	983.47	838.13	1027.07	755.77	886.576
1831.29	973.781	794.527	1033.53	741.236	896.266
1816.75	962.476	799.372	935.023	729.932	897.881
1803.84	952.787	729.932	936.638	723.472	891.421
1837.75	973.781	692.789	985.085	721.857	873.657
1844.21	967.321	710.553	986.7	725.087	865.583
1837.75	978.625	687.944	975.395	720.242	909.185
1863.59	915.644	673.41	968.936	710.553	893.036
1868.43	925.334	679.87	994.774	689.559	896.266
1944.33	926.949	699.249	1017.38	649.187	844.589
1931.41	910.8	700.864	1025.46	639.498	834.9
1912.03	938.253	689.559	1030.3	645.957	884.961
1842.59	935.023	687.944	970.551	626.579	883.347
1813.53	947.942	681.485	978.625	623.349	897.881
1807.07	970.551	676.64	967.321	481.238	891.421
1778	994.774	668.566	972.166	450.555	893.036
1742.47	993.159	681.485	907.57	469.934	886.576
1734.4	1151.42	683.1	905.955	510.306	883.347
1723.09	1154.65	673.41	891.421	515.151	880.117
1721.48	1127.2	679.87	914.03	549.064	868.813
952.787	1125.58	678.255	926.949	552.293	880.117
944.713	1133.66	679.87	931.793	555.523	813.906
1070.67	1128.81	707.323	915.644	557.138	775.149
1075.52	1115.89	681.485	941.483	560.368	783.223
1080.36	1067.44	658.876	938.253	612.045	765.459
1193.41	1046.45	676.64	943.098	626.579	757.385
1201.48	1080.36	671.796	962.476	662.106	755.77
1206.33	1054.53	683.1	941.483	665.336	754.155
1224.09	1077.13	678.255	936.638	654.032	757.385
1275.77	1069.06	671.796	944.713	655.647	736.391
1283.84	1062.6	678.255	964.091	639.498	733.162
1309.68	1072.29	673.41	968.936	649.187	694.404
1317.75	1070.67	683.1	960.861	642.727	715.398
1338.75	1057.76	694.404	949.557	639.498	723.472
1351.67	1090.05	697.634	944.713	644.342	710.553
1350.05	1091.67	691.174	946.327	662.106	713.783
1380.73	1081.98	718.627	1002.85	660.491	715.398
1408.19	1072.29	749.31	975.395	673.41	699.249
1419.49	1022.23	747.696	1007.69	571.672	691.174
1414.65	1044.84	750.925	986.7	592.666	694.404
1419.49	1028.69	741.236	983.47	579.747	675.025
1425.95	1019	750.925	986.7	560.368	671.796
1432.41	1022.23	799.372	960.861	561.983	665.336
1430.8	1019	791.298	956.017	549.064	715.398
1445.33	952.787	805.832	946.327	555.523	713.783
1448.56	944.713	802.602	923.719	587.821	768.689
1450.17	936.638	797.757	912.415	584.591	763.844
1296.76	1033.53	644.342	880.117	586.206	749.31
1291.91	1049.68	639.498	851.049	581.362	647.572
1295.14	1036.76	644.342	834.9	582.976	702.479
1225.7	1035.15	633.038	842.974	578.132	708.938
1233.78	1036.76	626.579	815.521	650.802	681.485
1225.7	1023.84	633.038	817.136	649.187	699.249
1177.26	1020.61	624.964	847.819	641.113	697.634
1157.88	1007.69	620.119	826.825	642.727	696.019
1154.65	1019	621.734	799.372	645.957	692.789
1119.12	1002.85	616.889	794.527	647.572	662.106
1109.43	991.544	639.498	771.919	650.802	649.187
991.544	975.395	613.659	747.696	641.113	644.342
1028.69	957.632	634.653	739.621	654.032	633.038
1153.03	946.327	628.193	736.391	650.802	576.517
1182.1	928.564	626.579	749.31	647.572	612.045
1264.46	912.415	612.045	765.459	645.957	597.51
1396.88	884.961	623.349	771.919	641.113	594.281
1401.73	883.347	621.734	776.764	600.74	589.436
1382.35	697.634	605.585	770.304	552.293	592.666
1367.81	710.553	833.285	791.298	550.679	584.591
1434.03	713.783	828.44	759	552.293	586.206
1518	715.398	846.204	767.074	566.828	600.74
1532.53	741.236	854.278	779.993	524.84	582.976
1505.08	733.162	881.732	763.844	571.672	608.815
1416.26	763.844	876.887	794.527	591.051	602.355
1390.42	755.77	883.347	767.074	589.436	607.2
1406.57	729.932	859.123	763.844	550.679	624.964
1320.98	707.323	878.502	744.466	553.908	634.653
1348.44	684.715	907.57	739.621	570.057	639.498
1319.37	681.485	923.719	736.391	582.976	658.876
1351.67	687.944	907.57	729.932	600.74	655.647
1335.52	649.187	923.719	708.938	592.666	654.032
1508.31	654.032	926.949	707.323	599.125	652.417
1497.01	700.864	918.874	723.472	616.889	634.653
1479.24	694.404	925.334	731.547	624.964	629.808
1472.78	696.019	918.874	733.162	629.808	650.802
1530.92	654.032	1006.08	746.081	610.43	657.262
1516.38	683.1	1033.53	741.236	621.734	662.106
1527.69	689.559	1007.69	681.485	620.119	671.796
1476.01	699.249	1015.77	679.87	600.74	689.559
1448.56	670.181	986.7	642.727	594.281	694.404
1472.78	665.336	989.93	707.323	616.889	696.019
1479.24	678.255	996.389	708.938	618.504	691.174
1495.39	673.41	1002.85	712.168	623.349	633.038
1500.24	750.925	993.159	749.31	626.579	576.517
1530.92	755.77	964.091	752.54	608.815	570.057
1550.3	744.466	944.713	754.155	620.119	571.672
1537.38	752.54	1002.85	792.913	618.504	557.138
1535.76	779.993	1007.69	818.751	624.964	516.766
1521.23	747.696	1006.08	815.521	626.579	508.691
1534.15	637.883	1010.92	838.13	560.368	536.145
1521.23	642.727	1035.15	828.44	594.281	519.996
1511.54	675.025	1044.84	833.285	599.125	521.611
1500.24	681.485	1041.61	820.366	603.97	536.145
1484.09	675.025	1056.14	842.974	613.659	545.834
1537.38	670.181	1054.53	821.981	610.43	542.604
1556.76	687.944	1046.45	836.515	613.659	532.915
1538.99	696.019	1041.61	842.974	623.349	537.759
1551.91	681.485	1072.29	846.204	626.579	555.523
1540.61	679.87	1059.37	841.359	616.889	557.138
1535.76	700.864	1070.67	831.67	613.659	561.983
1482.47	707.323	1046.45	815.521	620.119	524.84
1374.27	705.708	1056.14	821.981	623.349	536.145
1361.35	712.168	1101.36	813.906	605.585	539.374
1277.38	736.391	1117.51	805.832	621.734	545.834
1133.66	734.776	1125.58	802.602	618.504	563.598
1146.57	733.162	1128.81	799.372	689.559	566.828
1393.65	723.472	1115.89	796.142	691.174	547.449
1392.04	712.168	926.949	802.602	692.789	532.915
1417.88	708.938	912.415	791.298	691.174	528.07
1358.13	681.485	896.266	799.372	686.33	531.3
1256.39	815.521	873.657	773.534	718.627	505.462
1290.3	823.596	897.881	781.608	665.336	507.076
1374.27	828.44	881.732	778.379	755.77	495.772
1385.58	838.13	1022.23	779.993	747.696	519.996
1383.96	849.434	1014.15	797.757	783.223	523.225
1369.43	857.508	996.389	796.142	789.683	534.53
1372.66	859.123	999.619	804.217	791.298	547.449
1319.37	860.738	998.004	792.913	818.751	550.679
1306.45	823.596	986.7	786.453	830.055	553.908
1267.69	804.217	998.004	754.155	826.825	565.213
1251.54	789.683	980.24	739.621	823.596	544.219
1043.22	799.372	972.166	736.391	825.21	523.225
1065.83	791.298	973.781	723.472	834.9	518.381
1046.45	775.149	896.266	708.938	860.738	492.542
1059.37	763.844	891.421	741.236	846.204	499.002
1022.23	762.23	889.806	771.919	839.744	647.572
1027.07	765.459	899.496	773.534	875.272	665.336
1059.37	779.993	912.415	692.789	857.508	681.485
1075.52	873.657	905.955	762.23	851.049	687.944
1073.9	860.738	925.334	754.155	852.664	696.019
1117.51	867.198	931.793	762.23	859.123	700.864
1144.96	794.527	946.327	715.398	849.434	696.019
1132.04	788.068	947.942	760.615	854.278	705.708
1167.57	789.683	951.172	765.459	859.123	713.783
1165.95	776.764	956.017	734.776	867.198	705.708
1148.19	792.913	964.091	755.77	922.104	686.33
1207.94	768.689	909.185	754.155	931.793	671.796
1516.38	754.155	914.03	763.844	917.259	683.1
1506.7	733.162	910.8	739.621	907.57	678.255
1509.93	728.317	904.34	796.142	876.887	683.1
1495.39	729.932	902.725	786.453	878.502	676.64
1492.16	712.168	894.651	784.838	872.042	683.1
1477.63	710.553	883.347	746.081	875.272	671.796
1364.58	725.087	889.806	760.615	889.806	676.64
1067.44	729.932	905.955	749.31	881.732	673.41
1020.61	712.168	873.657	833.285	905.955	676.64
989.93	723.472	886.576	836.515	917.259	718.627
909.185	717.013	891.421	844.589	933.408	715.398
883.347	723.472	893.036	831.67	952.787	720.242
849.434	708.938	930.178	836.515	962.476	728.317
857.508	704.093	920.489	831.67	999.619	726.702
847.819	728.317	915.644	821.981	1027.07	728.317
862.353	731.547	918.874	823.596	1020.61	742.851
849.434	723.472	941.483	867.198	1025.46	739.621
844.589	721.857	931.793	888.191	981.855	736.391
833.285	713.783	935.023	881.732	994.774	762.23
839.744	537.759	1046.45	883.347	1004.46	805.832
842.974	582.976	1051.3	873.657	1009.31	804.217
847.819	566.828	1030.3	859.123	1060.98	791.298
854.278	612.045	1009.31	844.589	977.01	778.379
860.738	618.504	986.7	849.434	967.321	768.689
878.502	623.349	847.819	839.744	938.253	757.385
886.576	610.43	836.515	838.13	933.408	754.155
897.881	612.045	842.974	842.974	923.719	763.844
905.955	610.43	833.285	839.744	863.968	755.77
922.104	624.964	828.44	842.974	852.664	760.615
946.327	636.268	862.353	880.117	857.508	767.074
965.706	639.498	844.589	867.198	849.434	759
967.321	662.106	841.359	907.57	838.13	752.54
988.315	666.951	834.9	905.955	880.117	763.844
1001.23	675.025	878.502	909.185	873.657	762.23
1025.46	694.404	872.042	905.955	930.178	768.689
1031.92	692.789	860.738	939.868	949.557	755.77
1030.3	691.174	872.042	926.949	964.091	763.844
1148.19	595.896	926.949	920.489	928.564	642.727
1183.72	600.74	918.874	876.887	944.713	633.038
1198.25	594.281	941.483	865.583	975.395	639.498
1191.79	607.2	914.03	970.551	999.619	641.113
1230.55	603.97	917.259	914.03	1002.85	676.64
1498.62	616.889	904.34	925.334	1023.84	687.944
1514.77	594.281	907.57	1054.53	1025.46	783.223
1580.98	699.249	910.8	1020.61	1028.69	775.149
1611.66	702.479	909.185	1017.38	1019	767.074
1362.97	723.472	901.11	1004.46	973.781	783.223
1380.73	720.242	905.955	985.085	989.93	792.913
1382.35	715.398	897.881	983.47	1172.41	783.223
1406.57	720.242	894.651	973.781	1185.33	788.068
1416.26	726.702	878.502	967.321	1212.78	794.527
1437.25	739.621	872.042	962.476	1585.83	802.602
1429.18	731.547	891.421	922.104	1592.28	799.372
1432.41	729.932	904.34	930.178	1582.6	815.521
1427.57	708.938	922.104	941.483	1584.21	830.055
1437.25	700.864	907.57	933.408	1579.37	810.676
1413.03	802.602	891.421	959.247	1563.22	815.521
1395.27	791.298	902.725	884.961	1550.3	807.447
1430.8	788.068	904.34	875.272	1571.29	825.21
1429.18	789.683	860.738	870.427	1547.07	813.906
1421.11	770.304	875.272	873.657	1519.61	839.744
1416.26	765.459	854.278	876.887	1509.93	821.981
1422.72	755.77	810.676	875.272	1500.24	826.825
1450.17	760.615	786.453	884.961	1501.85	812.291
1438.87	757.385	813.906	878.502	1543.84	805.832
1434.03	750.925	762.23	847.819	1518	902.725
1430.8	755.77	676.64	834.9	1524.46	909.185
1629.43	710.553	673.41	833.285	1537.38	931.793
1618.12	708.938	681.485	917.259	1538.99	907.57
1598.74	663.721	694.404	925.334	1451.79	860.738
1752.16	658.876	707.323	923.719	1461.48	855.893
1774.77	675.025	710.553	926.949	1467.94	857.508
1765.08	673.41	715.398	923.719	1456.63	849.434
1761.85	675.025	712.168	905.955	1455.02	857.508
1732.78	670.181	686.33	896.266	1458.25	880.117
1724.71	665.336	675.025	857.508	1456.63	870.427
1697.25	684.715	686.33	833.285	1472.78	855.893
1681.1	641.113	687.944	839.744	1467.94	860.738
1671.41	649.187	718.627	902.725	1458.25	873.657
1655.27	626.579	665.336	896.266	1474.4	888.191
1614.89	616.889	663.721	852.664	1548.68	886.576
1621.35	613.659	671.796	857.508	1563.22	878.502
1616.51	595.896	637.883	854.278	1540.61	875.272
1434.03	592.666	631.423	857.508	1474.4	878.502
1445.33	579.747	626.579	851.049	1661.73	883.347
1740.85	578.132	618.504	831.67	1685.95	949.557
1640.73	584.591	624.964	752.54	1698.87	926.949
1451.79	676.64	620.119	741.236	1676.26	964.091
1403.34	668.566	629.808	642.727	1689.18	956.017
1341.98	662.106	636.268	644.342	1668.18	962.476
1314.52	549.064	641.113	629.808	1655.27	912.415
1329.06	545.834	655.647	662.106	1755.39	821.981
1317.75	526.455	671.796	676.64	1760.23	838.13
1325.83	528.07	684.715	668.566	1781.23	842.974
1329.06	529.685	683.1	655.647	1773.15	844.589
1337.13	526.455	679.87	696.019	1768.31	833.285
1330.67	519.996	678.255	692.789	1739.24	857.508
1314.52	510.306	650.802	704.093	1618.12	855.893
1308.06	508.691	639.498	696.019	1595.51	870.427
1304.83	603.97	623.349	683.1	1613.28	857.508
1301.6	605.585	620.119	684.715	1220.86	854.278
1309.68	602.355	629.808	691.174	1224.09	839.744
1366.2	605.585	636.268	699.249	1341.98	821.981
1364.58	508.691	663.721	715.398	1354.9	813.906
1324.21	523.225	665.336	713.783	1338.75	812.291
1343.59	529.685	666.951	708.938	1332.29	825.21
1338.75	532.915	623.349	739.621	1516.38	826.825
1335.52	547.449	644.342	729.932	1479.24	788.068
1320.98	549.064	650.802	723.472	1521.23	771.919
1325.83	542.604	644.342	731.547	1527.69	755.77
1275.77	552.293	634.653	738.006	1529.3	760.615
1469.55	553.908	628.193	736.391	1571.29	763.844
1466.32	550.679	671.796	662.106	1555.14	770.304
1471.17	549.064	681.485	652.417	1551.91	788.068
1241.85	557.138	691.174	708.938	1537.38	775.149
1266.08	553.908	686.33	707.323	1542.22	679.87
1283.84	560.368	752.54	717.013	1537.38	675.025
1081.98	549.064	804.217	738.006	1527.69	655.647
1117.51	561.983	838.13	749.31	1555.14	662.106
1170.8	560.368	828.44	747.696	1542.22	654.032
1177.26	582.976	821.981	812.291	1545.45	678.255
1195.02	573.287	823.596	788.068	1643.96	700.864
1188.56	570.057	818.751	783.223	1669.8	708.938
1182.1	558.753	828.44	757.385	1661.73	697.634
1183.72	557.138	849.434	760.615	1674.64	683.1
1216.01	587.821	847.819	757.385	1679.49	670.181
1230.55	634.653	823.596	755.77	1692.41	692.789
1238.62	636.268	828.44	747.696	1681.1	705.708
1254.77	631.423	807.447	765.459	1705.33	720.242
1190.18	634.653	786.453	757.385	1703.71	705.708
1159.49	641.113	789.683	750.925	1658.5	687.944
1020.61	645.957	783.223	742.851	1653.65	689.559
1025.46	658.876	810.676	744.466	1472.78	731.547
1031.92	647.572	800.987	726.702	1467.94	728.317
1027.07	521.611	810.676	723.472	1422.72	723.472
1022.23	540.989	799.372	721.857	1416.26	713.783
1036.76	570.057	784.838	696.019	1400.11	616.889
1044.84	576.517	786.453	704.093	1387.19	792.913
1030.3	582.976	789.683	700.864	1396.88	773.534
1031.92	584.591	796.142	765.459	1387.19	789.683
1044.84	594.281	826.825	731.547	1243.47	796.142
1019	591.051	842.974	721.857	1222.47	788.068
1041.61	637.883	844.589	708.938	1227.32	784.838
1049.68	668.566	852.664	697.634	1216.01	773.534
1052.91	657.262	883.347	702.479	1214.4	771.919
1039.99	650.802	891.421	710.553	1248.31	770.304
1052.91	592.666	883.347	704.093	1224.09	736.391
1048.07	591.051	875.272	696.019	1172.41	726.702
1059.37	595.896	842.974	676.64	1149.8	725.087
998.004	603.97	830.055	649.187	1153.03	741.236
1031.92	629.808	844.589	773.534	1072.29	747.696
1060.98	634.653	847.819	768.689	1073.9	749.31
1059.37	615.274	834.9	763.844	1069.06	757.385
1073.9	613.659	830.055	744.466	912.415	776.764
1112.66	607.2	809.061	749.31	925.334	771.919
1120.74	589.436	812.291	750.925	930.178	773.534
1132.04	592.666	813.906	744.466	918.874	770.304
1144.96	605.585	771.919	749.31	915.644	763.844
1140.11	602.355	768.689	736.391	889.806	768.689
1130.43	597.51	815.521	763.844	844.589	763.844
956.017	602.355	810.676	708.938	849.434	760.615
960.861	610.43	733.162	702.479	844.589	746.081
967.321	608.815	702.479	713.783	842.974	738.006
1041.61	610.43	707.323	728.317	812.291	728.317
1006.08	623.349	697.634	733.162	807.447	725.087
991.544	624.964	699.249	725.087	805.832	726.702
994.774	634.653	704.093	715.398	817.136	731.547
980.24	629.808	728.317	720.242	794.527	729.932
972.166	647.572	718.627	652.417	792.913	717.013
993.159	681.485	710.553	684.715	799.372	702.479
1006.08	654.032	720.242	725.087	699.249	681.485
1001.23	647.572	726.702	721.857	692.789	679.87
1012.54	641.113	731.547	705.708	676.64	729.932
1056.14	654.032	725.087	704.093	650.802	760.615
1219.24	650.802	738.006	702.479	665.336	767.074
1232.16	613.659	750.925	704.093	687.944	781.608
1214.4	589.436	786.453	705.708	676.64	757.385
1201.48	603.97	781.608	689.559	650.802	741.236
1128.81	613.659	778.379	694.404	624.964	746.081
1102.97	624.964	786.453	725.087	665.336	747.696
1128.81	621.734	821.981	723.472	671.796	739.621
1119.12	626.579	818.751	718.627	670.181	705.708
1123.97	600.74	820.366	720.242	678.255	717.013
1128.81	595.896	817.136	721.857	666.951	813.906
1148.19	582.976	815.521	729.932	678.255	812.291
1149.8	641.113	818.751	705.708	699.249	815.521
1140.11	618.504	813.906	781.608	721.857	633.038
1136.88	636.268	800.987	700.864	708.938	641.113
1128.81	629.808	783.223	710.553	728.317	623.349
1146.57	636.268	788.068	723.472	710.553	628.193
1203.1	626.579	794.527	729.932	717.013	623.349
1157.88	582.976	779.993	726.702	720.242	634.653
1170.8	608.815	773.534	778.379	723.472	636.268
1243.47	587.821	763.844	788.068	725.087	631.423
1249.93	592.666	757.385	770.304	700.864	655.647
1254.77	600.74	742.851	678.255	713.783	654.032
1272.54	599.125	754.155	687.944	749.31	686.33
1253.16	594.281	749.31	692.789	800.987	691.174
1266.08	615.274	744.466	676.64	820.366	694.404
1243.47	584.591	734.776	704.093	817.136	712.168
1240.24	605.585	717.013	707.323	831.67	704.093
1243.47	602.355	713.783	696.019	846.204	702.479
1198.25	612.045	715.398	692.789	870.427	710.553
1186.95	607.2	723.472	684.715	812.291	718.627
1174.03	608.815	717.013	678.255	804.217	744.466
1185.33	613.659	725.087	665.336	994.774	749.31
1195.02	608.815	733.162	658.876	1012.54	765.459
1196.64	602.355	726.702	689.559	1023.84	763.844
1193.41	603.97	723.472	696.019	1035.15	773.534
1178.87	595.896	663.721	704.093	1044.84	776.764
1114.28	584.591	662.106	679.87	1165.95	767.074
1143.34	589.436	649.187	684.715	1172.41	775.149
1256.39	603.97	628.193	679.87	1180.49	757.385
1288.68	607.2	621.734	691.174	1199.87	752.54
1306.45	599.125	636.268	712.168	1207.94	771.919
1283.84	581.362	615.274	702.479	1225.7	773.534
1290.3	618.504	623.349	683.1	1259.62	754.155
1275.77	721.857	608.815	670.181	1280.61	747.696
1280.61	723.472	633.038	639.498	1270.92	746.081
1269.31	707.323	683.1	749.31	1293.53	650.802
1243.47	725.087	673.41	750.925	1333.9	621.734
1233.78	710.553	666.951	778.379	1316.14	620.119
1023.84	708.938	683.1	786.453	1320.98	612.045
1007.69	697.634	687.944	794.527	1299.99	621.734
1036.76	699.249	702.479	788.068	1362.97	650.802
1030.3	689.559	686.33	821.981	1337.13	652.417
1038.38	692.789	712.168	839.744	1324.21	654.032
1174.03	686.33	708.938	838.13	1320.98	649.187
1178.87	691.174	710.553	841.359	1301.6	655.647
1188.56	684.715	637.883	849.434	1256.39	641.113
1203.1	679.87	623.349	857.508	1329.06	637.883
1217.63	654.032	613.659	854.278	1354.9	570.057
1195.02	658.876	624.964	855.893	1361.35	581.362
1285.45	649.187	647.572	846.204	1356.51	568.442
1296.76	644.342	633.038	844.589	1375.89	584.591
1298.37	642.727	637.883	789.683	1359.74	602.355
1279	645.957	636.268	791.298	1329.06	607.2
1311.29	637.883	610.43	778.379	1291.91	602.355
1269.31	608.815	602.355	783.223	1316.14	626.579
1291.91	725.087	600.74	771.919	1308.06	623.349
1269.31	718.627	591.051	779.993	1320.98	642.727
1259.62	715.398	594.281	789.683	1312.91	665.336
1249.93	728.317	602.355	788.068	1311.29	670.181
1261.23	739.621	571.672	729.932	1327.44	663.721
1245.08	721.857	573.287	734.776	1320.98	644.342
1232.16	725.087	570.057	752.54	1309.68	689.559
1214.4	702.479	563.598	733.162	1298.37	691.174
1198.25	715.398	557.138	746.081	1279	696.019
1204.71	713.783	566.828	741.236	1254.77	723.472
1228.93	723.472	563.598	796.142	1238.62	717.013
1237.01	725.087	561.983	778.379	1232.16	734.776
1220.86	736.391	571.672	792.913	1209.56	723.472
1232.16	739.621	558.753	786.453	1198.25	731.547
1241.85	731.547	566.828	788.068	1180.49	718.627
1388.81	738.006	597.51	804.217	1178.87	713.783
1358.13	742.851	599.125	760.615	1141.73	696.019
1380.73	739.621	678.255	757.385	986.7	734.776
1371.04	733.162	675.025	765.459	1001.23	741.236
1375.89	744.466	658.876	760.615	1006.08	739.621
1367.81	733.162	699.249	796.142	1012.54	746.081
1296.76	826.825	794.527	759	1023.84	755.77
1253.16	831.67	792.913	749.31	959.247	757.385
1178.87	744.466	757.385	750.925	952.787	738.006
1266.08	776.764	700.864	755.77	933.408	746.081
1258	721.857	702.479	760.615	923.719	749.31
1269.31	723.472	707.323	754.155	918.874	755.77
1251.54	731.547	700.864	802.602	878.502	757.385
1361.35	734.776	662.106	720.242	909.185	752.54
1392.04	744.466	647.572	733.162	967.321	755.77
1406.57	747.696	631.423	717.013	952.787	779.993
1408.19	760.615	579.747	728.317	933.408	778.379
1427.57	763.844	576.517	726.702	944.713	784.838
1430.8	759	581.362	723.472	946.327	752.54
1416.26	762.23	573.287	658.876	983.47	755.77
1413.03	770.304	574.902	665.336	939.868	750.925
1406.57	768.689	584.591	686.33	973.781	757.385
1283.84	771.919	587.821	683.1	989.93	755.77
1296.76	767.074	561.983	697.634	1002.85	778.379
1304.83	779.993	550.679	691.174	1017.38	792.913
1280.61	755.77	549.064	700.864	977.01	784.838
1288.68	750.925	544.219	704.093	994.774	771.919
1196.64	749.31	537.759	705.708	989.93	778.379
1195.02	755.77	552.293	700.864	1052.91	763.844
1180.49	750.925	560.368	699.249	1098.13	784.838
1186.95	746.081	592.666	697.634	1099.74	789.683
1188.56	754.155	589.436	694.404	1143.34	791.298
1159.49	759	600.74	696.019	1178.87	783.223
1144.96	776.764	602.355	708.938	1195.02	799.372
1167.57	670.181	623.349	720.242	1209.56	789.683
1148.19	671.796	629.808	721.857	1206.33	768.689
1135.27	702.479	636.268	713.783	1222.47	773.534
1209.56	683.1	652.417	699.249	1264.46	781.608
1211.17	684.715	647.572	686.33	1270.92	771.919
1227.32	673.41	649.187	679.87	1253.16	763.844
1230.55	681.485	641.113	712.168	1285.45	679.87
1251.54	665.336	734.776	665.336	1314.52	687.944
1237.01	671.796	750.925	686.33	1285.45	678.255
1243.47	662.106	733.162	675.025	1293.53	768.689
1220.86	665.336	736.391	679.87	1338.75	807.447
1267.69	699.249	729.932	696.019	1427.57	825.21
1298.37	683.1	726.702	687.944	1434.03	828.44
1304.83	704.093	699.249	673.41	1448.56	838.13
1138.5	708.938	725.087	697.634	1530.92	849.434
1174.03	712.168	624.964	694.404	1695.64	860.738
1246.7	717.013	631.423	689.559	1789.3	836.515
1238.62	712.168	628.193	694.404	1787.69	851.049
1245.08	705.708	507.076	702.479	1765.08	854.278
1256.39	692.789	499.002	673.41	1766.69	849.434
1233.78	678.255	505.462	678.255	1779.61	844.589
1237.01	696.019	524.84	705.708	1832.9	841.359
1217.63	608.815	523.225	710.553	1844.21	833.285
1180.49	607.2	513.536	738.006	1826.44	847.819
1188.56	594.281	521.611	736.391	1857.13	876.887
1172.41	581.362	524.84	708.938	1902.34	1038.38
1180.49	592.666	528.07	794.527	1924.95	1036.76
1062.6	584.591	524.84	776.764	1915.26	1039.99
1054.53	579.747	529.685	792.913	1924.95	1027.07
1098.13	578.132	568.442	778.379	1847.44	1030.3
1083.59	592.666	561.983	763.844	1861.97	1020.61
1051.3	570.057	568.442	757.385	1829.67	1025.46
1046.45	573.287	574.902	781.608	1834.52	1027.07
1052.91	570.057	579.747	804.217	1876.51	1028.69
1096.51	565.213	574.902	799.372	1870.05	1025.46
1099.74	568.442	581.362	783.223	1874.89	1027.07
1093.28	565.213	586.206	781.608	1886.2	1038.38
1067.44	568.442	592.666	773.534	1895.88	1043.22
1088.44	591.051	595.896	778.379	1871.66	1041.61
1073.9	613.659	578.132	771.919	1873.28	1025.46
1094.9	616.889	586.206	768.689	1834.52	1014.15
1083.59	684.715	549.064	781.608	2002.47	1019
1114.28	696.019	547.449	778.379	2008.93	1015.77
1106.2	704.093	540.989	789.683	2015.39	1007.69
1115.89	691.174	589.436	796.142	1955.64	1001.23
1120.74	700.864	568.442	800.987	1979.86	985.085
1214.4	705.708	565.213	807.447	2005.7	994.774
1219.24	713.783	561.983	776.764	1973.4	993.159
1235.39	692.789	549.064	770.304	2088.06	1017.38
1227.32	715.398	550.679	773.534	2105.82	964.091
1238.62	734.776	542.604	786.453	2239.86	980.24
1240.24	707.323	532.915	797.757	2235.01	964.091
1177.26	708.938	424.717	804.217	2233.4	959.247
1174.03	707.323	429.562	789.683	2243.09	954.402
1156.26	712.168	426.332	807.447	2225.32	941.483
1151.42	697.634	419.872	792.913	2278.61	943.098
1149.8	710.553	418.257	773.534	2281.84	812.291
1279	700.864	400.494	770.304	2262.47	807.447
1311.29	694.404	481.238	762.23	2432.03	738.006
1320.98	665.336	489.313	770.304	2381.97	752.54
1269.31	655.647	494.157	755.77	2443.33	807.447
1245.08	704.093	500.617	776.764	2469.17	797.757
1228.93	699.249	528.07	786.453	2472.4	804.217
1214.4	692.789	537.759	810.676	2469.17	810.676
1206.33	768.689	524.84	826.825	2301.22	854.278
1280.61	752.54	508.691	821.981	2280.23	823.596
1285.45	775.149	507.076	818.751	2293.15	821.981
1259.62	768.689	510.306	807.447	2331.91	830.055
1256.39	770.304	502.232	800.987	2360.97	831.67
1245.08	820.366	495.772	809.061	2364.2	834.9
1233.78	831.67	492.542	783.223	2323.83	831.67
1243.47	854.278	521.611	779.993	2351.28	813.906
1237.01	855.893	515.151	749.31	2349.67	804.217
1222.47	825.21	474.779	733.162	2346.44	615.274
1240.24	828.44	473.164	671.796	2301.22	647.572
1245.08	830.055	489.313	663.721	2325.45	675.025
1243.47	821.981	494.157	654.032	2335.14	678.255
1240.24	805.832	495.772	655.647	2354.51	673.41
1237.01	860.738	500.617	658.876	2357.74	675.025
1198.25	875.272	507.076	684.715	2375.51	681.485
1177.26	867.198	500.617	692.789	2377.12	699.249
1174.03	891.421	494.157	673.41	2381.97	691.174
1167.57	901.11	489.313	652.417	2349.67	684.715
1169.18	897.881	494.157	650.802	2406.19	689.559
1188.56	893.036	492.542	647.572	2423.95	694.404
1154.65	883.347	482.853	657.262	2449.79	691.174
1133.66	859.123	479.623	649.187	2428.8	679.87
1125.58	841.359	507.076	657.262	2440.1	676.64
1220.86	802.602	510.306	768.689	2446.56	673.41
1190.18	796.142	505.462	775.149	2433.64	686.33
1230.55	789.683	523.225	767.074	2296.38	683.1
1240.24	842.974	528.07	781.608	2291.53	678.255
1401.73	838.13	487.698	770.304	2341.6	663.721
1390.42	831.67	511.921	771.919	2393.27	658.876
1434.03	813.906	757.385	755.77	2318.99	647.572
1435.64	833.285	888.191	763.844	2291.53	645.957
1425.95	783.223	910.8	765.459	2201.1	607.2
1304.83	791.298	914.03	786.453	2249.55	605.585
1299.99	792.913	918.874	794.527	2262.47	645.957
1290.3	788.068	917.259	802.602	2121.97	678.255
1277.38	786.453	910.8	805.832	2186.57	681.485
1279	794.527	922.104	807.447	2133.27	699.249
1272.54	784.838	926.949	809.061	2291.53	718.627
1274.15	789.683	925.334	794.527	2301.22	717.013
1290.3	797.757	844.589	792.913	2365.82	744.466
1269.31	830.055	587.821	788.068	2262.47	728.317
1293.53	863.968	519.996	757.385	2281.84	731.547
1288.68	973.781	531.3	770.304	2262.47	686.33
1128.81	1030.3	494.157	783.223	2288.3	687.944
1132.04	943.098	500.617	776.764	2160.73	689.559
1138.5	1025.46	471.549	768.689	2157.5	670.181
1120.74	1020.61	484.468	762.23	2084.83	658.876
1122.35	1033.53	486.083	726.702	2112.28	623.349
1111.05	1038.38	494.157	754.155	2004.08	633.038
1109.43	1043.22	489.313	720.242	2029.92	657.262
960.861	956.017	486.083	739.621	2144.58	662.106
946.327	973.781	476.393	734.776	2112.28	683.1
1112.66	996.389	479.623	731.547	2131.66	697.634
1144.96	993.159	481.238	738.006	2091.29	713.783
1156.26	980.24	487.698	729.932	2067.06	717.013
1161.11	975.395	486.083	726.702	2042.84	700.864
1186.95	972.166	490.928	728.317	2121.97	713.783
1327.44	968.936	479.623	744.466	2083.21	692.789
1335.52	967.321	476.393	752.54	2104.21	699.249
1322.6	930.178	468.319	746.081	2123.58	725.087
1356.51	925.334	469.934	755.77	2105.82	731.547
1364.58	909.185	447.325	760.615	2081.6	697.634
1353.28	915.644	450.555	759	2097.75	689.559
1477.63	899.496	452.17	750.925	2110.67	696.019
1529.3	886.576	444.096	739.621	2104.21	692.789
1542.22	888.191	460.245	738.006	2079.98	826.825
1540.61	886.576	615.274	726.702	2068.68	825.21
1537.38	884.961	602.355	731.547	2062.22	831.67
1530.92	883.347	605.585	721.857	1926.57	841.359
1503.47	878.502	615.274	729.932	1989.55	836.515
1518	870.427	610.43	744.466	2049.3	831.67
1527.69	862.353	589.436	762.23	2073.52	834.9
1383.96	876.887	555.523	904.34	2065.45	844.589
1385.58	857.508	552.293	899.496	2055.76	839.744
1403.34	854.278	571.672	800.987	2052.53	817.136
1383.96	851.049	555.523	810.676	2029.92	813.906
1346.82	855.893	558.753	807.447	2008.93	809.061
1241.85	842.974	568.442	805.832	1989.55	812.291
1217.63	839.744	582.976	807.447	1976.63	817.136
1216.01	951.172	565.213	810.676	1979.86	815.521
1227.32	989.93	574.902	815.521	2005.7	752.54
1230.55	999.619	676.64	776.764	1933.03	726.702
1316.14	1030.3	684.715	775.149	1873.28	692.789
1317.75	1036.76	662.106	762.23	1850.67	708.938
1312.91	1044.84	665.336	738.006	1882.97	705.708
1275.77	1052.91	660.491	729.932	1819.98	707.323
1283.84	1072.29	671.796	736.391	1837.75	692.789
1293.53	1060.98	689.559	771.919	1652.04	707.323
1325.83	1057.76	699.249	763.844	1635.89	715.398
1317.75	1022.23	697.634	760.615	1640.73	696.019
1484.09	967.321	696.019	759	1613.28	689.559
1459.86	968.936	691.174	741.236	1629.43	692.789
1463.09	778.379	696.019	739.621	1634.27	694.404
1461.48	805.832	721.857	746.081	1587.44	684.715
1466.32	807.447	728.317	781.608	1585.83	668.566
1463.09	710.553	720.242	786.453	1593.9	670.181
1464.71	712.168	725.087	800.987	1618.12	658.876
1453.4	741.236	729.932	789.683	1569.68	647.572
1563.22	794.527	739.621	794.527	1600.36	621.734
1540.61	812.291	733.162	784.838	1453.4	612.045
1551.91	818.751	744.466	771.919	1479.24	620.119
1545.45	800.987	746.081	788.068	1456.63	605.585
1404.96	776.764	741.236	765.459	1432.41	658.876
1369.43	796.142	733.162	757.385	1466.32	624.964
1377.5	839.744	734.776	747.696	1450.17	626.579
1371.04	862.353	747.696	768.689	1406.57	615.274
1350.05	859.123	752.54	746.081	1427.57	666.951
1159.49	888.191	754.155	799.372	1421.11	665.336
1374.27	901.11	762.23	813.906	1413.03	662.106
1361.35	951.172	738.006	826.825	1419.49	524.84
1319.37	980.24	783.223	807.447	1414.65	545.834
1308.06	981.855	804.217	804.217	1398.5	657.262
1329.06	975.395	809.061	802.602	1406.57	654.032
1222.47	959.247	794.527	799.372	1398.5	650.802
1245.08	975.395	663.721	786.453	1451.79	678.255
1249.93	978.625	654.032	781.608	1464.71	684.715
1296.76	975.395	647.572	767.074	1479.24	692.789
1298.37	978.625	670.181	755.77	1530.92	725.087
1304.83	980.24	676.64	570.057	1535.76	746.081
1298.37	983.47	684.715	555.523	1542.22	752.54
1287.07	967.321	681.485	560.368	1464.71	760.615
1288.68	956.017	666.951	549.064	1371.04	754.155
1343.59	972.166	673.41	553.908	1369.43	771.919
1320.98	968.936	681.485	647.572	1371.04	791.298
1380.73	962.476	670.181	637.883	1392.04	800.987
1422.72	959.247	697.634	618.504	1390.42	783.223
1453.4	954.402	699.249	612.045	1382.35	791.298
1450.17	918.874	700.864	694.404	1364.58	797.757
1451.79	836.515	629.808	715.398	1353.28	786.453
1442.1	805.832	628.193	757.385	1341.98	789.683
1464.71	807.447	624.964	755.77	1311.29	797.757
1495.39	796.142	634.653	749.31	1287.07	776.764
1421.11	797.757	662.106	770.304	1335.52	813.906
1422.72	786.453	692.789	818.751	1430.8	804.217
1453.4	781.608	694.404	817.136	1419.49	828.44
1442.1	768.689	678.255	799.372	1393.65	839.744
1438.87	823.596	683.1	802.602	1398.5	852.664
1424.34	836.515	700.864	805.832	1388.81	865.583
1396.88	833.285	670.181	809.061	1387.19	876.887
1388.81	807.447	662.106	800.987	1393.65	893.036
1261.23	784.838	697.634	831.67	1345.21	888.191
1259.62	778.379	704.093	851.049	1359.74	902.725
1274.15	759	710.553	852.664	1308.06	889.806
1282.23	765.459	705.708	841.359	1301.6	894.651
1314.52	770.304	694.404	847.819	1311.29	897.881
1325.83	765.459	708.938	804.217	1317.75	901.11
1327.44	744.466	712.168	802.602	1241.85	828.44
1547.07	681.485	705.708	786.453	1214.4	851.049
1574.52	691.174	713.783	812.291	1198.25	935.023
1580.98	718.627	717.013	802.602	1177.26	936.638
1569.68	720.242	721.857	804.217	1172.41	894.651
1571.29	686.33	707.323	818.751	1199.87	1085.21
1608.43	762.23	718.627	825.21	1201.48	1115.89
1598.74	752.54	721.857	836.515	1188.56	1128.81
1614.89	770.304	729.932	846.204	1183.72	1051.3
1608.43	778.379	754.155	870.427	1174.03	1064.21
1600.36	763.844	684.715	859.123	1136.88	1054.53
1601.97	791.298	679.87	857.508	1081.98	1064.21
1387.19	741.236	666.951	767.074	1093.28	1080.36
1398.5	728.317	684.715	754.155	1059.37	1065.83
1392.04	741.236	686.33	752.54	1044.84	1057.76
1409.8	746.081	681.485	784.838	1038.38	1060.98
1371.04	729.932	662.106	797.757	1078.75	1017.38
1362.97	725.087	700.864	800.987	1067.44	1006.08
1320.98	707.323	705.708	789.683	1039.99	1002.85
1312.91	710.553	704.093	796.142	994.774	1001.23
1277.38	713.783	692.789	792.913	973.781	999.619
1282.23	717.013	700.864	791.298	989.93	994.774
1306.45	721.857	708.938	789.683	960.861	991.544
1304.83	708.938	715.398	810.676	923.719	989.93
1337.13	713.783	686.33	813.906	933.408	980.24
1285.45	736.391	689.559	825.21	936.638	983.47
1277.38	728.317	691.174	804.217	935.023	980.24
1178.87	744.466	679.87	736.391	925.334	977.01
1161.11	752.54	683.1	744.466	935.023	972.166
1143.34	750.925	665.336	747.696	884.961	973.781
1148.19	736.391	662.106	683.1	870.427	1027.07
1198.25	725.087	655.647	691.174	863.968	994.774
1190.18	728.317	657.262	668.566	855.893	991.544
1159.49	771.919	649.187	658.876	878.502	993.159
1133.66	767.074	650.802	662.106	881.732	972.166
1127.2	860.738	576.517	652.417	865.583	968.936
1135.27	852.664	555.523	645.957	846.204	951.172
1127.2	789.683	553.908	608.815	773.534	922.104
1141.73	792.913	557.138	613.659	762.23	912.415
1151.42	800.987	537.759	631.423	765.459	902.725
1146.57	807.447	542.604	628.193	754.155	893.036
1156.26	846.204	561.983	675.025	741.236	875.272
1136.88	873.657	507.076	676.64	770.304	880.117
1130.43	880.117	513.536	629.808	783.223	886.576
1143.34	872.042	507.076	610.43	794.527	881.732
1122.35	865.583	500.617	678.255	799.372	1019
1138.5	852.664	507.076	662.106	805.832	994.774
1161.11	847.819	502.232	670.181	804.217	988.315
1135.27	857.508	578.132	649.187	799.372	894.651
1130.43	854.278	563.598	652.417	804.217	901.11
1107.82	805.832	568.442	668.566	815.521	728.317
762.23	812.291	582.976	663.721	818.751	744.466
960.861	794.527	584.591	642.727	813.906	755.77
957.632	797.757	579.747	644.342	799.372	752.54
962.476	718.627	570.057	624.964	792.913	747.696
1006.08	668.566	568.442	634.653	738.006	733.162
1035.15	675.025	549.064	623.349	830.055	725.087
1044.84	663.721	558.753	636.268	828.44	704.093
1048.07	654.032	557.138	631.423	830.055	665.336
1072.29	649.187	608.815	633.038	833.285	658.876
1077.13	641.113	610.43	600.74	813.906	655.647
1067.44	631.423	603.97	675.025	791.298	654.032
1204.71	623.349	605.585	665.336	797.757	666.951
1227.32	626.579	600.74	678.255	792.913	652.417
1228.93	623.349	570.057	883.347	746.081	662.106
1235.39	616.889	542.604	881.732	744.466	658.876
1233.78	621.734	531.3	893.036	741.236	655.647
1282.23	831.67	526.455	897.881	733.162	662.106
1267.69	828.44	519.996	878.502	726.702	657.262
1272.54	831.67	511.921	875.272	755.77	660.491
1290.3	825.21	510.306	873.657	747.696	663.721
1537.38	813.906	490.928	862.353	728.317	671.796
1561.6	810.676	484.468	857.508	720.242	673.41
1516.38	813.906	489.313	849.434	710.553	678.255
1509.93	802.602	492.542	854.278	760.615	744.466
1526.07	813.906	479.623	852.664	783.223	755.77
1511.54	817.136	478.008	849.434	760.615	754.155
1513.15	820.366	502.232	844.589	771.919	757.385
1506.7	812.291	500.617	847.819	794.527	775.149
1493.78	876.887	502.232	821.981	809.061	733.162
1425.95	860.738	497.387	834.9	817.136	830.055
1419.49	791.298	495.772	844.589	820.366	826.825
1434.03	804.217	487.698	849.434	786.453	825.21
1438.87	797.757	479.623	847.819	791.298	828.44
1446.94	804.217	469.934	878.502	792.913	831.67
1424.34	799.372	457.015	865.583	794.527	823.596
1450.17	794.527	450.555	873.657	915.644	825.21
1442.1	757.385	436.021	830.055	905.955	842.974
1432.41	733.162	424.717	831.67	860.738	859.123
1450.17	742.851	411.798	846.204	854.278	851.049
1445.33	747.696	402.108	936.638	847.819	860.738
1450.17	754.155	437.636	943.098	833.285	872.042
1446.94	765.459	434.406	941.483	820.366	868.813
1443.71	771.919	413.413	873.657	826.825	851.049
1448.56	755.77	397.264	868.813	847.819	849.434
1422.72	752.54	313.289	865.583	846.204	729.932
1364.58	759	311.674	870.427	844.589	731.547
1345.21	752.54	308.445	857.508	838.13	839.744
1348.44	762.23	298.755	872.042	872.042	938.253
1356.51	760.615	305.215	875.272	873.657	935.023
1359.74	768.689	363.351	876.887	883.347	920.489
1159.49	796.142	402.108	894.651	767.074	893.036
1204.71	794.527	403.723	902.725	757.385	889.806
1212.78	792.913	394.034	884.961	755.77	886.576
1144.96	799.372	392.419	899.496	759	893.036
1112.66	821.981	339.128	886.576	749.31	891.421
1106.2	846.204	329.438	896.266	738.006	896.266
1091.67	986.7	301.985	910.8	784.838	914.03
1128.81	989.93	279.377	914.03	794.527	920.489
1135.27	983.47	298.755	925.334	800.987	917.259
1014.15	989.93	305.215	828.44	889.806	910.8
1090.05	972.166	298.755	826.825	904.34	923.719
1091.67	768.689	277.762	791.298	917.259	912.415
1077.13	752.54	287.451	644.342	915.644	901.11
1083.59	736.391	289.066	657.262	893.036	907.57
1070.67	747.696	303.6	652.417	912.415	899.496
1019	749.31	300.37	668.566	946.327	910.8
1031.92	759	316.519	679.87	944.713	1148.19
1025.46	747.696	321.364	683.1	933.408	1140.11
1020.61	755.77	334.283	675.025	905.955	1135.27
704.093	744.466	327.823	681.485	909.185	1140.11
776.764	750.925	331.053	789.683	891.421	1153.03
767.074	686.33	334.283	804.217	875.272	1072.29
831.67	700.864	329.438	818.751	876.887	1060.98
833.285	673.41	337.513	810.676	862.353	1059.37
834.9	660.491	350.432	809.061	855.893	1043.22
846.204	657.262	387.574	815.521	834.9	1057.76
847.819	689.559	394.034	821.981	876.887	972.166
1206.33	679.87	405.338	826.825	870.427	981.855
1228.93	686.33	408.568	842.974	862.353	989.93
1225.7	683.1	410.183	830.055	868.813	994.774
1214.4	673.41	427.947	807.447	888.191	1015.77
1219.24	668.566	424.717	813.906	886.576	1025.46
1206.33	665.336	431.176	823.596	870.427	1031.92
1224.09	676.64	432.791	809.061	749.31	1015.77
1227.32	666.951	431.176	804.217	768.689	1010.92
1216.01	655.647	432.791	797.757	767.074	1033.53
1259.62	652.417	431.176	831.67	770.304	1090.05
1303.22	637.883	429.562	823.596	771.919	1109.43
1309.68	715.398	427.947	826.825	778.379	1132.04
1327.44	717.013	415.028	749.31	794.527	1159.49
1325.83	715.398	426.332	742.851	789.683	1186.95
1382.35	713.783	419.872	784.838	786.453	1170.8
1403.34	802.602	427.947	805.832	768.689	1043.22
1443.71	797.757	424.717	807.447	763.844	964.091
1467.94	799.372	421.487	812.291	760.615	1007.69
1469.55	762.23	434.406	823.596	786.453	1010.92
1474.4	791.298	461.859	807.447	763.844	1028.69
1450.17	788.068	482.853	799.372	839.744	1043.22
1448.56	786.453	479.623	922.104	844.589	1098.13
1450.17	754.155	492.542	920.489	876.887	1096.51
1451.79	728.317	495.772	918.874	881.732	1196.64
1471.17	579.747	502.232	920.489	880.117	1186.95
1466.32	587.821	511.921	925.334	872.042	1154.65
1563.22	591.051	510.306	935.023	875.272	1170.8
1571.29	594.281	513.536	954.402	868.813	1169.18
1582.6	599.125	482.853	951.172	838.13	1190.18
1547.07	595.896	489.313	943.098	834.9	1183.72
1577.75	603.97	471.549	939.868	862.353	1198.25
1569.68	629.808	578.132	1017.38	765.459	1207.94
1561.6	645.957	570.057	1025.46	763.844	1216.01
1542.22	641.113	586.206	1022.23	770.304	1225.7
1564.83	639.498	576.517	1019	750.925	1224.09
1592.28	628.193	579.747	1009.31	734.776	1038.38
1606.82	629.808	599.125	1006.08	704.093	1014.15
1655.27	623.349	612.045	1154.65	741.236	1006.08
1671.41	616.889	603.97	1148.19	731.547	1002.85
1698.87	629.808	621.734	1136.88	747.696	1069.06
1703.71	628.193	616.889	1149.8	728.317	1060.98
1700.48	582.976	620.119	1109.43	747.696	1067.44
1731.17	579.747	623.349	1086.82	744.466	1070.67
1679.49	578.132	620.119	1093.28	749.31	1062.6
1682.72	579.747	618.504	1107.82	754.155	1070.67
1592.28	578.132	602.355	1102.97	741.236	1075.52
1597.13	542.604	600.74	1098.13	760.615	1091.67
1608.43	558.753	594.281	1101.36	708.938	1183.72
1582.6	616.889	600.74	1086.82	717.013	1156.26
1610.05	618.504	595.896	1091.67	705.708	1175.64
1293.53	624.964	592.666	1086.82	736.391	1191.79
1375.89	610.43	587.821	1088.44	720.242	1188.56
1377.5	612.045	605.585	1083.59	718.627	1159.49
1516.38	595.896	613.659	1073.9	791.298	1157.88
1538.99	612.045	615.274	1054.53	789.683	1153.03
1619.74	610.43	628.193	1046.45	784.838	1148.19
1611.66	516.766	629.808	1036.76	805.832	1119.12
1655.27	518.381	628.193	1051.3	812.291	1060.98
1624.58	689.559	618.504	1012.54	818.751	1048.07
1627.81	702.479	616.889	1039.99	821.981	1023.84
1640.73	705.708	608.815	1088.44	826.825	1019
1616.51	649.187	615.274	1154.65	846.204	993.159
1624.58	663.721	620.119	1159.49	872.042	1019
1643.96	636.268	618.504	1120.74	897.881	1072.29
1639.12	641.113	592.666	1111.05	820.366	1138.5
1590.67	644.342	612.045	1125.58	839.744	1141.73
1561.6	642.727	603.97	1119.12	820.366	1130.43
1627.81	662.106	662.106	1122.35	833.285	1078.75
1660.11	702.479	699.249	1135.27	878.502	1075.52
1661.73	704.093	704.093	1025.46	891.421	1060.98
1681.1	738.006	708.938	1017.38	904.34	1027.07
1687.56	742.851	707.323	1002.85	899.496	951.172
1697.25	747.696	713.783	1019	894.651	930.178
1705.33	749.31	707.323	1031.92	918.874	943.098
1900.73	739.621	699.249	1019	909.185	954.402
1913.65	747.696	636.268	1007.69	912.415	939.868
1918.49	738.006	602.355	1001.23	901.11	947.942
1819.98	742.851	603.97	1048.07	905.955	930.178
1828.06	744.466	613.659	1039.99	865.583	928.564
1845.82	741.236	610.43	1041.61	870.427	931.793
1834.52	739.621	602.355	1048.07	865.583	914.03
1836.13	729.932	563.598	1059.37	855.893	917.259
1824.83	731.547	571.672	1065.83	860.738	909.185
1821.6	739.621	591.051	1069.06	851.049	933.408
1794.15	736.391	641.113	1070.67	820.366	917.259
1778	749.31	637.883	1054.53	844.589	912.415
1734.4	752.54	645.957	873.657	833.285	941.483
1721.48	760.615	615.274	959.247	823.596	956.017
1758.62	757.385	628.193	957.632	826.825	888.191
1748.93	752.54	637.883	947.942	846.204	891.421
1773.15	749.31	647.572	949.557	849.434	884.961
1766.69	720.242	645.957	918.874	842.974	925.334
1781.23	710.553	676.64	912.415	849.434	930.178
1800.61	715.398	668.566	901.11	823.596	920.489
2039.61	707.323	666.951	896.266	855.893	912.415
2041.22	713.783	657.262	931.793	849.434	899.496
2044.45	712.168	655.647	922.104	884.961	775.149
2041.22	713.783	666.951	910.8	868.813	789.683
2078.37	717.013	660.491	912.415	875.272	781.608
2057.37	697.634	663.721	899.496	880.117	773.534
2049.3	696.019	702.479	915.644	883.347	807.447
1958.87	681.485	707.323	912.415	815.521	810.676
1978.24	675.025	739.621	909.185	825.21	813.906
1842.59	657.262	744.466	920.489	826.825	809.061
1781.23	502.232	754.155	922.104	831.67	796.142
1803.84	534.53	750.925	926.949	847.819	826.825
1810.3	521.611	742.851	910.8	830.055	833.285
1771.54	523.225	755.77	876.887	807.447	838.13
1813.53	518.381	754.155	767.074	809.061	821.981
1808.68	519.996	757.385	771.919	792.913	834.9
1855.51	528.07	731.547	865.583	802.602	786.453
1858.74	531.3	749.31	863.968	784.838	660.491
1860.36	528.07	733.162	862.353	759	686.33
1976.63	536.145	678.255	863.968	717.013	721.857
2007.31	539.374	657.262	862.353	687.944	729.932
1912.03	469.934	665.336	891.421	705.708	723.472
1933.03	466.704	652.417	852.664	699.249	721.857
1905.57	478.008	658.876	844.589	705.708	723.472
1908.8	494.157	652.417	849.434	707.323	770.304
1900.73	521.611	660.491	915.644	654.032	802.602
1847.44	479.623	668.566	909.185	665.336	810.676
1842.59	481.238	689.559	893.036	662.106	862.353
1828.06	489.313	687.944	872.042	666.951	854.278
1642.35	490.928	683.1	876.887	650.802	873.657
1677.87	528.07	679.87	883.347	633.038	865.583
1676.26	515.151	671.796	872.042	637.883	863.968
1656.88	518.381	663.721	849.434	620.119	860.738
1652.04	511.921	729.932	854.278	613.659	883.347
1631.04	518.381	720.242	868.813	612.045	884.961
1635.89	540.989	742.851	750.925	618.504	894.651
1621.35	528.07	707.323	747.696	657.262	897.881
1600.36	521.611	712.168	836.515	665.336	893.036
1610.05	529.685	654.032	830.055	720.242	899.496
1643.96	586.206	673.41	847.819	713.783	904.34
1645.58	599.125	686.33	844.589	708.938	909.185
1676.26	600.74	681.485	847.819	710.553	904.34
1690.79	594.281	687.944	757.385	717.013	881.732
1685.95	591.051	694.404	778.379	715.398	923.719
1645.58	621.734	681.485	784.838	713.783	918.874
1668.18	618.504	687.944	783.223	712.168	910.8
1700.48	610.43	686.33	794.527	702.479	943.098
1753.77	592.666	697.634	804.217	676.64	914.03
1729.55	613.659	671.796	810.676	679.87	907.57
1753.77	633.038	684.715	775.149	692.789	925.334
1540.61	639.498	692.789	788.068	655.647	928.564
1603.59	644.342	696.019	784.838	687.944	918.874
1618.12	658.876	686.33	789.683	686.33	914.03
1660.11	770.304	692.789	792.913	681.485	905.955
1643.96	779.993	707.323	804.217	673.41	907.57
1674.64	784.838	665.336	802.602	670.181	880.117
1681.1	781.608	668.566	812.291	657.262	912.415
1713.4	757.385	637.883	807.447	700.864	949.557
1698.87	770.304	636.268	809.061	718.627	1004.46
1802.22	763.844	647.572	825.21	705.708	1017.38
1816.75	759	658.876	813.906	713.783	1012.54
1798.99	757.385	660.491	815.521	697.634	998.004
1784.46	750.925	717.013	813.906	708.938	986.7
1765.08	749.31	712.168	694.404	707.323	1065.83
1761.85	773.534	713.783	684.715	715.398	1073.9
1723.09	768.689	710.553	683.1	729.932	1067.44
1689.18	755.77	692.789	692.789	723.472	1114.28
1708.56	750.925	689.559	696.019	715.398	1101.36
1574.52	752.54	673.41	676.64	687.944	1067.44
1579.37	713.783	679.87	692.789	704.093	1162.72
1572.91	720.242	665.336	778.379	702.479	1159.49
1577.75	707.323	678.255	799.372	704.093	1156.26
1739.24	683.1	673.41	830.055	702.479	1159.49
1758.62	679.87	697.634	875.272	720.242	1077.13
1781.23	681.485	671.796	870.427	725.087	1049.68
1824.83	686.33	673.41	875.272	797.757	1114.28
1839.36	671.796	767.074	891.421	796.142	1102.97
1831.29	642.727	768.689	886.576	799.372	1112.66
1826.44	639.498	788.068	876.887	784.838	1109.43
1824.83	668.566	776.764	875.272	792.913	1114.28
1844.21	670.181	718.627	893.036	747.696	1138.5
1860.36	666.951	692.789	991.544	746.081	1128.81
1879.74	662.106	686.33	998.004	759	1120.74
1858.74	641.113	683.1	896.266	757.385	1125.58
1871.66	624.964	681.485	891.421	765.459	1123.97
1933.03	631.423	652.417	886.576	755.77	1125.58
1926.57	592.666	668.566	893.036	762.23	1132.04
1895.88	581.362	663.721	884.961	763.844	1120.74
1915.26	578.132	676.64	849.434	752.54	1101.36
1942.72	553.908	668.566	859.123	770.304	1080.36
1926.57	540.989	689.559	860.738	767.074	1077.13
1962.1	542.604	705.708	855.893	765.459	1075.52
1981.47	721.857	704.093	847.819	763.844	1072.29
2028.31	717.013	707.323	859.123	775.149	1073.9
1960.48	713.783	697.634	852.664	788.068	1036.76
1945.95	692.789	686.33	849.434	773.534	1043.22
1916.88	712.168	683.1	847.819	763.844	1030.3
1962.1	574.902	670.181	849.434	767.074	1027.07
1929.8	595.896	679.87	852.664	749.31	1127.2
1902.34	594.281	668.566	849.434	708.938	1161.11
1950.79	595.896	670.181	831.67	704.093	1162.72
1929.8	591.051	691.174	833.285	729.932	1170.8
1944.33	594.281	676.64	820.366	728.317	1174.03
1949.18	602.355	691.174	836.515	723.472	1182.1
1926.57	607.2	687.944	821.981	742.851	1186.95
1886.2	610.43	686.33	820.366	728.317	1207.94
1879.74	631.423	683.1	847.819	734.776	1170.8
1823.21	652.417	675.025	846.204	731.547	1117.51
1912.03	694.404	681.485	844.589	715.398	1077.13
1900.73	689.559	597.51	828.44	705.708	1080.36
1923.34	691.174	650.802	825.21	728.317	1106.2
1907.19	694.404	666.951	902.725	731.547	1102.97
1929.8	675.025	663.721	889.806	747.696	1122.35
1973.4	671.796	678.255	888.191	789.683	1046.45
1987.93	678.255	683.1	897.881	804.217	1028.69
1981.47	700.864	673.41	881.732	799.372	994.774
1983.09	702.479	689.559	802.602	791.298	989.93
1986.32	705.708	687.944	704.093	763.844	986.7
1976.63	702.479	704.093	708.938	783.223	978.625
1936.26	708.938	696.019	671.796	694.404	865.583
1863.59	704.093	675.025	676.64	702.479	860.738
1895.88	705.708	668.566	654.032	700.864	857.508
1879.74	710.553	639.498	673.41	702.479	849.434
1842.59	781.608	642.727	666.951	718.627	860.738
1828.06	818.751	649.187	665.336	717.013	813.906
1853.9	821.981	647.572	666.951	768.689	810.676
1970.17	834.9	555.523	650.802	712.168	794.527
1989.55	810.676	542.604	550.679	733.162	797.757
2050.91	825.21	581.362	537.759	746.081	775.149
2058.99	828.44	608.815	552.293	731.547	781.608
2057.37	834.9	620.119	574.902	720.242	778.379
2089.67	836.515	633.038	576.517	717.013	771.919
2104.21	842.974	626.579	586.206	715.398	784.838
2100.98	849.434	629.808	579.747	699.249	791.298
2067.06	857.508	628.193	589.436	715.398	862.353
2086.44	865.583	629.808	594.281	704.093	884.961
2028.31	902.725	612.045	579.747	713.783	867.198
2099.36	899.496	623.349	570.057	728.317	883.347
2126.81	907.57	613.659	592.666	713.783	884.961
2079.98	896.266	612.045	581.362	678.255	886.576
2112.28	918.874	603.97	586.206	671.796	804.217
2115.51	915.644	587.821	602.355	660.491	852.664
2133.27	752.54	586.206	594.281	684.715	860.738
2121.97	778.379	579.747	592.666	689.559	870.427
2214.02	770.304	576.517	586.206	683.1	841.359
2243.09	759	579.747	582.976	679.87	765.459
2239.86	771.919	566.828	576.517	691.174	747.696
2241.47	776.764	578.132	710.553	687.944	746.081
2139.73	770.304	573.287	720.242	671.796	723.472
2123.58	765.459	566.828	736.391	746.081	755.77
2136.5	763.844	560.368	720.242	750.925	744.466
2178.49	762.23	558.753	738.006	739.621	738.006
2163.96	759	550.679	742.851	731.547	718.627
2176.88	762.23	558.753	736.391	750.925	712.168
2186.57	739.621	565.213	741.236	775.149	781.608
2205.94	721.857	560.368	687.944	779.993	779.993
2128.43	712.168	557.138	689.559	776.764	786.453
2052.53	704.093	560.368	773.534	789.683	760.615
2117.12	662.106	513.536	783.223	754.155	771.919
2189.8	666.951	568.442	791.298	746.081	747.696
2199.48	663.721	799.372	731.547	765.459	759
2175.26	665.336	786.453	770.304	712.168	799.372
2188.18	678.255	778.379	768.689	702.479	804.217
2167.19	666.951	776.764	760.615	707.323	818.751
2155.88	670.181	773.534	757.385	718.627	820.366
2146.19	666.951	755.77	768.689	713.783	815.521
2172.03	676.64	752.54	749.31	697.634	834.9
2273.77	692.789	746.081	771.919	704.093	876.887
2254.39	728.317	739.621	812.291	708.938	881.732
2244.7	717.013	734.776	804.217	702.479	867.198
2233.4	721.857	744.466	802.602	700.864	865.583
2209.17	731.547	728.317	778.379	694.404	868.813
2223.71	749.31	749.31	794.527	673.41	870.427
2239.86	636.268	755.77	797.757	629.808	888.191
2241.47	597.51	744.466	812.291	621.734	873.657
2226.94	612.045	749.31	815.521	612.045	902.725
2078.37	615.274	717.013	799.372	620.119	904.34
2062.22	634.653	684.715	776.764	671.796	931.793
2039.61	621.734	691.174	799.372	684.715	967.321
2028.31	710.553	689.559	791.298	686.33	1057.76
2147.81	738.006	691.174	884.961	687.944	1060.98
2149.42	752.54	712.168	886.576	704.093	1035.15
2159.11	863.968	705.708	894.651	700.864	973.781
2144.58	873.657	715.398	905.955	696.019	1036.76
2197.87	851.049	712.168	891.421	686.33	1039.99
2184.95	810.676	710.553	894.651	683.1	1022.23
2207.56	818.751	705.708	901.11	687.944	1044.84
2181.72	813.906	708.938	889.806	705.708	1027.07
2133.27	823.596	717.013	884.961	710.553	1048.07
2091.29	847.819	718.627	912.415	691.174	1115.89
2081.6	878.502	717.013	915.644	723.472	1065.83
2004.08	847.819	715.398	941.483	741.236	1059.37
2115.51	846.204	712.168	951.172	746.081	1088.44
2131.66	838.13	700.864	947.942	733.162	1099.74
2120.35	828.44	694.404	944.713	736.391	1114.28
1984.7	817.136	702.479	830.055	749.31	1104.59
1957.25	815.521	699.249	813.906	665.336	1127.2
1966.94	804.217	705.708	784.838	678.255	1120.74
1976.63	791.298	694.404	813.906	686.33	1112.66
1950.79	789.683	681.485	846.204	708.938	1107.82
1955.64	815.521	694.404	855.893	712.168	1117.51
1879.74	817.136	678.255	852.664	668.566	1161.11
1903.96	820.366	725.087	854.278	671.796	1174.03
1863.59	828.44	718.627	855.893	683.1	1249.93
2057.37	836.515	746.081	775.149	678.255	1283.84
2052.53	859.123	728.317	771.919	679.87	1280.61
2054.14	875.272	681.485	767.074	684.715	1298.37
1960.48	873.657	436.021	752.54	657.262	1303.22
2013.77	912.415	503.847	731.547	715.398	1311.29
1955.64	944.713	545.834	736.391	699.249	1301.6
1979.86	928.564	544.219	728.317	697.634	1264.46
1962.1	909.185	549.064	733.162	708.938	1311.29
1939.49	965.706	566.828	729.932	781.608	1306.45
1928.18	957.632	570.057	744.466	778.379	1299.99
1910.42	935.023	574.902	721.857	809.061	1301.6
1884.58	926.949	573.287	702.479	812.291	1295.14
1887.81	920.489	578.132	901.11	818.751	1279
1761.85	884.961	573.287	896.266	804.217	1277.38
1773.15	896.266	576.517	930.178	800.987	1279
1798.99	893.036	571.672	926.949	805.832	1266.08
1778	868.813	560.368	917.259	799.372	1275.77
1765.08	888.191	592.666	939.868	763.844	1279
1761.85	897.881	591.051	917.259	755.77	1274.15
1715.02	899.496	613.659	941.483	759	1261.23
1684.33	889.806	603.97	960.861	770.304	1237.01
1685.95	881.732	605.585	973.781	755.77	1238.62
1650.42	855.893	615.274	978.625	746.081	1199.87
1671.41	857.508	616.889	954.402	744.466	1157.88
1660.11	770.304	628.193	996.389	728.317	1067.44
1555.14	734.776	624.964	1001.23	731.547	1311.29
1472.78	720.242	626.579	920.489	726.702	1340.36
1456.63	597.51	621.734	914.03	717.013	1335.52
1443.71	595.896	628.193	922.104	707.323	1298.37
1430.8	597.51	615.274	912.415	689.559	1322.6
1369.43	599.125	613.659	936.638	687.944	1330.67
1566.45	633.038	623.349	970.551	660.491	1314.52
1753.77	652.417	621.734	985.085	631.423	1350.05
1915.26	665.336	628.193	998.004	639.498	1345.21
1918.49	660.491	608.815	975.395	655.647	1359.74
1929.8	631.423	616.889	951.172	650.802	1362.97
1913.65	605.585	626.579	954.402	641.113	1371.04
1784.46	618.504	633.038	959.247	644.342	1380.73
1761.85	615.274	644.342	968.936	662.106	1395.27
1823.21	624.964	637.883	970.551	612.045	1387.19
1842.59	628.193	647.572	980.24	624.964	1398.5
1928.18	624.964	645.957	986.7	634.653	1388.81
1881.35	623.349	650.802	989.93	628.193	1380.73
1962.1	629.808	665.336	1004.46	608.815	1387.19
1963.71	633.038	639.498	960.861	599.125	1367.81
1950.79	612.045	629.808	978.625	605.585	1417.88
1960.48	607.2	663.721	975.395	670.181	1404.96
1954.02	612.045	662.106	960.861	666.951	1233.78
1942.72	637.883	668.566	964.091	633.038	1248.31
1905.57	628.193	658.876	972.166	602.355	1241.85
1902.34	634.653	599.125	964.091	612.045	1259.62
1729.55	633.038	563.598	968.936	621.734	1243.47
1716.63	657.262	568.442	943.098	826.825	1254.77
1750.54	623.349	565.213	959.247	831.67	1280.61
1771.54	565.213	549.064	964.091	859.123	1283.84
1748.93	555.523	539.374	959.247	857.508	1298.37
1761.85	560.368	537.759	944.713	844.589	1243.47
1727.94	495.772	545.834	930.178	794.527	1327.44
1729.55	536.145	544.219	923.719	807.447	1345.21
2018.62	540.989	539.374	904.34	786.453	1332.29
2033.15	531.3	537.759	738.006	784.838	1316.14
2046.07	534.53	550.679	726.702	799.372	1338.75
2020.23	553.908	536.145	813.906	802.602	1538.99
2044.45	550.679	544.219	800.987	817.136	1558.37
2034.77	634.653	552.293	813.906	828.44	1571.29
2023.46	623.349	576.517	792.913	823.596	1577.75
2017	621.734	568.442	786.453	818.751	1571.29
2031.54	641.113	663.721	759	820.366	1577.75
2036.38	634.653	631.423	754.155	809.061	1587.44
2057.37	628.193	633.038	757.385	818.751	1629.43
2062.22	652.417	626.579	776.764	825.21	1642.35
2104.21	645.957	623.349	718.627	828.44	1648.81
2102.59	639.498	670.181	728.317	839.744	1684.33
2088.06	666.951	665.336	734.776	841.359	1464.71
2084.83	660.491	675.025	759	857.508	1467.94
2060.6	666.951	663.721	755.77	854.278	1474.4
2065.45	684.715	671.796	757.385	852.664	1469.55
2068.68	694.404	691.174	746.081	857.508	1463.09
2062.22	679.87	681.485	736.391	852.664	1450.17
2063.83	657.262	697.634	746.081	859.123	1490.55
2079.98	654.032	696.019	731.547	893.036	1511.54
1991.16	657.262	692.789	721.857	899.496	1530.92
1910.42	660.491	696.019	708.938	876.887	1526.07
1648.81	658.876	691.174	721.857	883.347	1508.31
1529.3	699.249	676.64	762.23	876.887	1456.63
1482.47	691.174	678.255	773.534	878.502	1443.71
1469.55	681.485	691.174	770.304	870.427	1455.02
1474.4	684.715	697.634	759	867.198	1453.4
1471.17	742.851	694.404	757.385	870.427	1425.95
1403.34	750.925	645.957	741.236	883.347	1404.96
1350.05	759	696.019	891.421	873.657	1395.27
1316.14	767.074	700.864	893.036	886.576	1396.88
1253.16	788.068	707.323	894.651	893.036	1392.04
1237.01	812.291	645.957	854.278	825.21	1387.19
1246.7	821.981	649.187	851.049	813.906	1396.88
1253.16	813.906	652.417	849.434	838.13	1361.35
1232.16	792.913	657.262	855.893	844.589	1366.2
1258	778.379	658.876	841.359	842.974	1341.98
1279	775.149	668.566	860.738	834.9	1348.44
1282.23	771.919	673.41	863.968	675.025	1341.98
1233.78	747.696	731.547	865.583	676.64	1320.98
1238.62	757.385	749.31	849.434	694.404	1306.45
1241.85	747.696	752.54	844.589	705.708	1266.08
1214.4	752.54	755.77	847.819	710.553	1279
1161.11	739.621	760.615	842.974	725.087	1274.15
1170.8	710.553	750.925	863.968	802.602	1261.23
1167.57	773.534	755.77	872.042	818.751	1248.31
1198.25	768.689	762.23	867.198	825.21	1251.54
1241.85	747.696	754.155	872.042	831.67	1186.95
922.104	759	741.236	863.968	809.061	1267.69
926.949	726.702	710.553	797.757	804.217	1282.23
962.476	699.249	715.398	815.521	791.298	1251.54
985.085	700.864	708.938	813.906	792.913	1078.75
986.7	683.1	729.932	821.981	776.764	1038.38
985.085	684.715	691.174	860.738	765.459	1057.76
986.7	683.1	676.64	838.13	768.689	1090.05
970.551	684.715	566.828	842.974	755.77	1077.13
1006.08	683.1	581.362	849.434	754.155	1104.59
1049.68	658.876	587.821	821.981	783.223	1069.06
1046.45	763.844	599.125	831.67	779.993	1080.36
1049.68	746.081	589.436	830.055	946.327	1070.67
1038.38	739.621	624.964	817.136	947.942	1049.68
1046.45	725.087	586.206	825.21	938.253	1028.69
1051.3	718.627	589.436	820.366	935.023	994.774
1046.45	710.553	587.821	791.298	928.564	1102.97
1052.91	712.168	594.281	794.527	941.483	1111.05
1080.36	710.553	599.125	1017.38	936.638	1135.27
1077.13	712.168	592.666	1043.22	933.408	1117.51
1091.67	728.317	605.585	1046.45	920.489	1122.35
1096.51	710.553	599.125	1070.67	897.881	1080.36
1048.07	712.168	595.896	1056.14	883.347	1073.9
1057.76	673.41	587.821	1020.61	880.117	1048.07
1072.29	679.87	594.281	1033.53	870.427	1057.76
1135.27	673.41	589.436	1214.4	880.117	1078.75
1351.67	618.504	584.591	1219.24	893.036	1070.67
1383.96	613.659	595.896	1235.39	894.651	1094.9
1379.12	605.585	612.045	1240.24	893.036	1232.16
1385.58	597.51	644.342	1287.07	889.806	1227.32
1459.86	563.598	645.957	1220.86	875.272	1254.77
1458.25	555.523	594.281	1264.46	876.887	1264.46
1543.84	557.138	605.585	1285.45	878.502	1274.15
1556.76	560.368	620.119	1296.76	862.353	1277.38
1542.22	570.057	658.876	1287.07	839.744	1298.37
1553.53	574.902	670.181	1303.22	868.813	1317.75
1550.3	573.287	655.647	1366.2	849.434	1335.52
1538.99	566.828	654.032	1382.35	844.589	1459.86
1514.77	571.672	652.417	1417.88	847.819	1526.07
1505.08	563.598	663.721	1411.42	820.366	1532.53
1522.84	570.057	708.938	1421.11	817.136	1538.99
1505.08	571.672	660.491	1455.02	815.521	1537.38
1884.58	581.362	644.342	1450.17	778.379	1550.3
1834.52	576.517	657.262	1443.71	771.919	1563.22
1824.83	507.076	647.572	1445.33	747.696	1561.6
1797.38	479.623	657.262	1440.48	668.566	1597.13
1824.83	503.847	654.032	1430.8	686.33	1622.97
1850.67	490.928	720.242	1434.03	689.559	1669.8
1819.98	502.232	721.857	1472.78	684.715	1660.11
1818.37	479.623	726.702	1464.71	673.41	1653.65
1795.76	490.928	788.068	1461.48	676.64	1616.51
1807.07	487.698	815.521	1479.24	681.485	1592.28
1732.78	500.617	817.136	1513.15	684.715	1610.05
1713.4	526.455	836.515	1495.39	708.938	1608.43
1694.02	534.53	859.123	1514.77	715.398	1603.59
1685.95	406.953	873.657	1503.47	733.162	1582.6
1689.18	460.245	859.123	1501.85	741.236	1590.67
1698.87	458.63	854.278	1530.92	721.857	1574.52
1695.64	463.474	859.123	1535.76	696.019	1538.99
1690.79	466.704	854.278	1548.68	704.093	1547.07
1694.02	465.089	870.427	1559.99	531.3	1551.91
1682.72	458.63	860.738	1542.22	540.989	1550.3
1698.87	453.785	872.042	1571.29	547.449	1556.76
1697.25	431.176	878.502	1561.6	553.908	1569.68
1660.11	405.338	867.198	1577.75	565.213	1761.85
1589.05	403.723	1031.92	1568.06	571.672	1816.75
1587.44	397.264	1048.07	1613.28	573.287	1729.55
1576.14	534.53	1036.76	1417.88	565.213	1724.71
1579.37	523.225	1031.92	1419.49	563.598	1748.93
1569.68	544.219	1017.38	1437.25	570.057	1763.46
1542.22	534.53	1028.69	1434.03	578.132	1778
1553.53	532.915	1064.21	1416.26	560.368	1771.54
1542.22	526.455	1070.67	1548.68	544.219	1750.54
1534.15	524.84	1078.75	1558.37	570.057	1753.77
1530.92	511.921	1085.21	1556.76	560.368	1715.02
1513.15	531.3	1075.52	1388.81	579.747	1711.79
1527.69	529.685	1072.29	1450.17	589.436	1739.24
1532.53	532.915	1080.36	1424.34	587.821	1584.21
1559.99	536.145	1083.59	1432.41	592.666	1606.82
1482.47	537.759	1057.76	1299.99	591.051	1600.36
1513.15	547.449	1054.53	1290.3	582.976	1603.59
1416.26	539.374	1064.21	1259.62	574.902	1592.28
1464.71	529.685	1025.46	1293.53	586.206	1597.13
1477.63	523.225	1031.92	1319.37	605.585	1585.83
1482.47	636.268	991.544	1312.91	595.896	1584.21
1490.55	633.038	973.781	1290.3	607.2	1579.37
1477.63	641.113	977.01	1262.85	600.74	1445.33
1479.24	666.951	983.47	1266.08	599.125	1400.11
1464.71	681.485	989.93	1293.53	576.517	1461.48
1442.1	694.404	970.551	1280.61	571.672	1480.86
1477.63	707.323	944.713	1261.23	544.219	1471.17
1041.61	720.242	943.098	1316.14	621.734	1477.63
1099.74	726.702	951.172	1312.91	636.268	1471.17
1104.59	725.087	941.483	1320.98	649.187	1497.01
1122.35	728.317	936.638	1316.14	666.951	1482.47
1086.82	739.621	935.023	1320.98	679.87	1488.93
1072.29	729.932	926.949	1338.75	673.41	1484.09
1130.43	728.317	917.259	1322.6	683.1	1485.7
1111.05	715.398	851.049	1371.04	675.025	1487.32
1117.51	747.696	854.278	1364.58	665.336	1425.95
1106.2	755.77	852.664	1361.35	641.113	1400.11
1279	749.31	809.061	1383.96	657.262	1443.71
1264.46	715.398	770.304	1408.19	670.181	1448.56
1245.08	726.702	775.149	1416.26	675.025	1464.71
1249.93	729.932	755.77	1419.49	683.1	1456.63
1232.16	696.019	741.236	1416.26	679.87	1464.71
1183.72	704.093	731.547	1401.73	681.485	1456.63
1188.56	700.864	733.162	1404.96	697.634	1467.94
1199.87	708.938	725.087	1430.8	683.1	1440.48
1204.71	710.553	734.776	1519.61	692.789	1448.56
1262.85	726.702	720.242	1577.75	676.64	1425.95
1282.23	738.006	718.627	1589.05	683.1	1448.56
1285.45	741.236	700.864	1593.9	705.708	1380.73
1280.61	736.391	749.31	1616.51	718.627	1186.95
1283.84	755.77	739.621	1608.43	725.087	1140.11
1450.17	775.149	600.74	1618.12	718.627	1144.96
1466.32	781.608	594.281	1622.97	710.553	1130.43
1459.86	702.479	587.821	1618.12	715.398	1115.89
1390.42	692.789	581.362	1559.99	720.242	1159.49
1379.12	687.944	655.647	1592.28	742.851	1167.57
1375.89	705.708	628.193	1579.37	734.776	1216.01
1374.27	718.627	637.883	1464.71	754.155	1204.71
1366.2	717.013	657.262	1446.94	721.857	1198.25
1343.59	710.553	668.566	1514.77	734.776	1185.33
1332.29	707.323	634.653	1516.38	739.621	1203.1
1375.89	700.864	644.342	1529.3	752.54	1172.41
1346.82	717.013	647.572	1540.61	750.925	1141.73
1329.06	712.168	642.727	1542.22	729.932	1154.65
1282.23	720.242	641.113	1566.45	736.391	1198.25
1258	702.479	663.721	1558.37	721.857	1201.48
1238.62	705.708	655.647	1522.84	710.553	1203.1
1471.17	702.479	660.491	1500.24	707.323	1206.33
1498.62	589.436	665.336	1506.7	775.149	1203.1
1497.01	594.281	658.876	1522.84	771.919	1174.03
1505.08	592.666	655.647	1513.15	776.764	1169.18
1526.07	561.983	644.342	1582.6	778.379	1151.42
1514.77	536.145	628.193	1576.14	799.372	1102.97
1508.31	537.759	642.727	1566.45	783.223	1112.66
1456.63	534.53	629.808	1558.37	773.534	1111.05
1455.02	536.145	697.634	1543.84	720.242	1106.2
1466.32	519.996	704.093	1661.73	739.621	1303.22
1448.56	545.834	708.938	1610.05	715.398	1264.46
1445.33	563.598	736.391	1655.27	710.553	1249.93
1455.02	565.213	742.851	1648.81	713.783	1253.16
1450.17	547.449	744.466	1666.57	734.776	1191.79
1403.34	549.064	754.155	1647.19	733.162	1314.52
1414.65	568.442	757.385	1671.41	729.932	1309.68
1456.63	571.672	755.77	1656.88	736.391	1327.44
1445.33	536.145	762.23	1645.58	712.168	1354.9
1446.94	581.362	770.304	1676.26	694.404	1348.44
1304.83	589.436	773.534	1674.64	710.553	1317.75
1309.68	603.97	783.223	1632.66	705.708	1325.83
1340.36	587.821	792.913	1648.81	715.398	1320.98
1367.81	605.585	775.149	1631.04	692.789	1319.37
1358.13	652.417	821.981	1600.36	750.925	1324.21
1335.52	650.802	810.676	1648.81	770.304	1320.98
1358.13	654.032	970.551	1652.04	775.149	1327.44
1322.6	645.957	975.395	1660.11	762.23	1375.89
1298.37	642.727	970.551	1522.84	783.223	1372.66
1295.14	628.193	943.098	1582.6	759	1403.34
1306.45	633.038	946.327	1487.32	736.391	1390.42
1312.91	636.268	896.266	1505.08	729.932	1385.58
1350.05	637.883	905.955	1529.3	760.615	1416.26
1119.12	621.734	918.874	1513.15	786.453	1411.42
1130.43	628.193	912.415	1495.39	792.913	1422.72
1133.66	634.653	910.8	1493.78	802.602	1385.58
1136.88	597.51	859.123	1516.38	823.596	1400.11
1120.74	618.504	854.278	1526.07	830.055	1395.27
1115.89	605.585	838.13	1498.62	818.751	1406.57
1112.66	610.43	839.744	1495.39	789.683	1463.09
1111.05	613.659	836.515	1505.08	807.447	1459.86
1195.02	616.889	821.981	1532.53	802.602	1474.4
1185.33	621.734	828.44	1593.9	839.744	1464.71
1182.1	618.504	818.751	1526.07	849.434	1471.17
1141.73	620.119	820.366	1522.84	841.359	1466.32
1169.18	626.579	825.21	1448.56	828.44	1461.48
1285.45	595.896	820.366	1434.03	846.204	1455.02
1295.14	592.666	842.974	1446.94	841.359	1396.88
1301.6	587.821	846.204	1448.56	834.9	1404.96
1306.45	582.976	842.974	1458.25	842.974	1403.34
1031.92	594.281	844.589	1493.78	834.9	1393.65
1041.61	597.51	854.278	1501.85	830.055	1401.73
1081.98	586.206	855.893	1466.32	786.453	1466.32
1086.82	584.591	854.278	1476.01	802.602	1514.77
1132.04	605.585	852.664	1469.55	791.298	1521.23
1144.96	618.504	851.049	1400.11	789.683	1529.3
1597.13	616.889	831.67	1404.96	776.764	1503.47
1622.97	631.423	791.298	1427.57	786.453	1702.1
1590.67	628.193	778.379	1413.03	804.217	1480.86
1608.43	626.579	779.993	1429.18	786.453	1497.01
1652.04	616.889	757.385	1350.05	810.676	1527.69
1656.88	607.2	851.049	1351.67	776.764	1526.07
1669.8	595.896	863.968	1338.75	771.919	1529.3
1673.03	594.281	859.123	1329.06	770.304	1425.95
1643.96	610.43	891.421	1314.52	742.851	1413.03
1619.74	613.659	884.961	1311.29	788.068	1401.73
1624.58	628.193	865.583	1298.37	804.217	1393.65
1639.12	612.045	852.664	1275.77	807.447	1406.57
1637.5	573.287	844.589	1267.69	809.061	1440.48
1627.81	568.442	836.515	1279	815.521	1432.41
1605.2	570.057	820.366	1261.23	799.372	1455.02
1621.35	550.679	817.136	1214.4	789.683	1453.4
1595.51	529.685	767.074	1248.31	783.223	1446.94
1566.45	508.691	768.689	1206.33	815.521	1459.86
1508.31	550.679	608.815	1198.25	823.596	1387.19
1493.78	555.523	607.2	1222.47	759	1398.5
1484.09	591.051	628.193	1256.39	741.236	1353.28
1498.62	607.2	631.423	1191.79	738.006	1375.89
1505.08	605.585	636.268	1199.87	754.155	1419.49
1758.62	636.268	634.653	1217.63	731.547	1416.26
1757	629.808	636.268	1170.8	757.385	1414.65
1731.17	633.038	752.54	1169.18	767.074	1417.88
1737.63	589.436	771.919	1219.24	708.938	1438.87
1774.77	621.734	781.608	1209.56	705.708	1445.33
1797.38	629.808	775.149	1204.71	694.404	1419.49
1829.67	626.579	770.304	1246.7	692.789	1345.21
1834.52	616.889	767.074	1261.23	676.64	1312.91
1879.74	612.045	760.615	1269.31	678.255	1299.99
1810.3	610.43	755.77	1285.45	696.019	1309.68
1815.14	608.815	759	1290.3	671.796	1416.26
1821.6	613.659	752.54	1256.39	707.323	1466.32
1834.52	616.889	749.31	1183.72	728.317	1458.25
1726.32	618.504	754.155	1196.64	723.472	1519.61
1748.93	620.119	778.379	1191.79	802.602	1513.15
1755.39	633.038	773.534	1217.63	813.906	1505.08
1747.31	699.249	783.223	1219.24	810.676	1522.84
1745.7	704.093	736.391	1193.41	833.285	1524.46
1810.3	715.398	813.906	1186.95	834.9	1551.91
1789.3	707.323	817.136	1182.1	849.434	1572.91
1795.76	705.708	821.981	1146.57	863.968	1556.76
1778	715.398	828.44	1148.19	880.117	1548.68
1794.15	718.627	833.285	1177.26	888.191	1505.08
1748.93	696.019	838.13	1162.72	896.266	1485.7
1761.85	678.255	836.515	1175.64	915.644	1480.86
1230.55	696.019	833.285	1178.87	917.259	1471.17
1275.77	684.715	825.21	1164.34	922.104	1432.41
1277.38	686.33	820.366	1161.11	933.408	1241.85
1280.61	684.715	817.136	1138.5	925.334	1254.77
1392.04	707.323	788.068	1136.88	926.949	1258
1404.96	721.857	720.242	1128.81	901.11	1227.32
1401.73	713.783	699.249	1112.66	956.017	1209.56
1387.19	721.857	697.634	1098.13	943.098	1207.94
1416.26	699.249	683.1	1138.5	946.327	1222.47
1429.18	692.789	686.33	1130.43	904.34	1227.32
1464.71	683.1	692.789	1159.49	899.496	1220.86
1458.25	691.174	697.634	1141.73	868.813	1288.68
1459.86	739.621	700.864	1149.8	872.042	1287.07
1500.24	759	704.093	1256.39	894.651	1256.39
1532.53	762.23	715.398	1251.54	928.564	1279
1524.46	776.764	726.702	1245.08	930.178	1314.52
1535.76	775.149	741.236	1225.7	938.253	1301.6
1548.68	760.615	734.776	1240.24	943.098	1277.38
1547.07	723.472	731.547	1359.74	936.638	1258
1556.76	729.932	713.783	1366.2	901.11	1253.16
1561.6	708.938	697.634	1377.5	909.185	1340.36
1571.29	694.404	712.168	1354.9	912.415	1366.2
1579.37	699.249	718.627	1304.83	914.03	1345.21
1561.6	671.796	739.621	1317.75	912.415	1348.44
1338.75	678.255	721.857	1291.91	901.11	1335.52
1383.96	675.025	624.964	1282.23	909.185	1345.21
1430.8	666.951	607.2	1261.23	915.644	1390.42
1484.09	616.889	594.281	1258	960.861	1382.35
1579.37	600.74	589.436	1219.24	957.632	1395.27
1548.68	631.423	581.362	1258	996.389	1353.28
1545.45	634.653	576.517	1156.26	999.619	1409.8
1543.84	762.23	636.268	1287.07	1010.92	1383.96
1518	781.608	649.187	1269.31	1028.69	1390.42
1443.71	788.068	647.572	1319.37	1069.06	1366.2
1435.64	791.298	642.727	1299.99	1106.2	1406.57
1427.57	797.757	650.802	1275.77	1083.59	1371.04
1424.34	794.527	626.579	1266.08	1065.83	1322.6
1395.27	796.142	613.659	1359.74	1086.82	1337.13
1497.01	792.913	621.734	1346.82	1012.54	1298.37
1514.77	799.372	565.213	1317.75	1006.08	1319.37
1501.85	725.087	550.679	1324.21	998.004	1471.17
1503.47	723.472	555.523	1314.52	981.855	1445.33
1498.62	721.857	553.908	1301.6	983.47	1466.32
1501.85	728.317	565.213	1329.06	985.085	1477.63
1451.79	746.081	558.753	1455.02	981.855	1505.08
1466.32	742.851	547.449	1435.64	964.091	1501.85
1461.48	750.925	550.679	1416.26	943.098	1480.86
1514.77	759	540.989	1585.83	910.8	1476.01
1529.3	736.391	537.759	1574.52	909.185	1493.78
1526.07	728.317	552.293	1660.11	914.03	1506.7
1518	742.851	561.983	1674.64	926.949	1568.06
1511.54	736.391	558.753	1676.26	930.178	1566.45
1472.78	734.776	565.213	1645.58	920.489	1587.44
1443.71	736.391	563.598	1673.03	912.415	1589.05
1464.71	726.702	570.057	1684.33	873.657	1590.67
1354.9	733.162	561.983	1673.03	870.427	1584.21
1430.8	796.142	547.449	1645.58	876.887	1571.29
1437.25	794.527	550.679	1640.73	873.657	1563.22
1459.86	789.683	540.989	1629.43	886.576	1601.97
1467.94	746.081	542.604	1660.11	876.887	1537.38
1488.93	723.472	602.355	1590.67	881.732	1540.61
1492.16	733.162	615.274	1559.99	855.893	1534.15
1495.39	717.013	621.734	1634.27	825.21	1558.37
1789.3	747.696	612.045	1740.85	813.906	1556.76
1800.61	757.385	592.666	1745.7	815.521	1519.61
1808.68	789.683	589.436	1757	792.913	1535.76
1807.07	781.608	618.504	1584.21	794.527	1538.99
1803.84	783.223	621.734	1597.13	784.838	1547.07
1853.9	791.298	662.106	1639.12	800.987	1543.84
1855.51	800.987	665.336	1658.5	799.372	1613.28
1879.74	792.913	666.951	1671.41	807.447	1661.73
1850.67	813.906	662.106	1655.27	800.987	1658.5
1861.97	855.893	647.572	1674.64	826.825	1669.8
1857.13	857.508	655.647	1711.79	823.596	1610.05
1879.74	862.353	654.032	1726.32	817.136	1621.35
1826.44	881.732	675.025	1732.78	818.751	1603.59
1715.02	839.744	707.323	1723.09	788.068	1582.6
1745.7	726.702	718.627	1724.71	773.534	1589.05
1653.65	720.242	725.087	1744.08	762.23	1606.82
1656.88	725.087	723.472	1753.77	754.155	1611.66
1650.42	734.776	721.857	1627.81	718.627	1558.37
1629.43	729.932	708.938	1647.19	663.721	1568.06
1648.81	728.317	684.715	1603.59	676.64	1566.45
1637.5	733.162	692.789	1627.81	666.951	1564.83
1690.79	720.242	708.938	1663.34	660.491	1377.5
1679.49	770.304	702.479	1603.59	624.964	1392.04
1706.94	867.198	707.323	1564.83	631.423	1414.65
1601.97	1022.23	713.783	1568.06	613.659	1413.03
1603.59	1041.61	700.864	1558.37	603.97	1429.18
1593.9	1038.38	692.789	1555.14	687.944	1427.57
1589.05	1041.61	687.944	1547.07	684.715	1301.6
1572.91	1028.69	705.708	1551.91	675.025	1291.91
1564.83	1056.14	721.857	1534.15	673.41	1329.06
1603.59	1143.34	718.627	1354.9	668.566	1293.53
1589.05	1135.27	710.553	1456.63	683.1	1275.77
1564.83	1115.89	746.081	1453.4	686.33	1216.01
1505.08	939.868	752.54	1332.29	684.715	1232.16
1456.63	907.57	742.851	1253.16	662.106	1240.24
1458.25	883.347	744.466	1251.54	663.721	1254.77
1477.63	855.893	723.472	1240.24	666.951	1240.24
1479.24	842.974	741.236	1254.77	681.485	1259.62
1472.78	805.832	760.615	1261.23	668.566	1308.06
1453.4	800.987	791.298	1256.39	663.721	1301.6
1445.33	752.54	797.757	1354.9	668.566	1340.36
1450.17	728.317	809.061	1416.26	665.336	1345.21
1459.86	639.498	794.527	1398.5	657.262	1356.51
1306.45	642.727	789.683	1438.87	665.336	1372.66
1295.14	650.802	799.372	1425.95	660.491	1359.74
1322.6	633.038	834.9	1414.65	696.019	1358.13
1406.57	620.119	849.434	1379.12	694.404	1425.95
1416.26	666.951	828.44	1324.21	712.168	1404.96
1474.4	668.566	809.061	1298.37	710.553	1408.19
1109.43	637.883	813.906	1238.62	717.013	1372.66
1143.34	660.491	809.061	1316.14	715.398	1371.04
1159.49	666.951	823.596	1400.11	749.31	1374.27
1162.72	663.721	821.981	1526.07	757.385	1380.73
1075.52	654.032	823.596	1513.15	755.77	1393.65
1099.74	660.491	802.602	1511.54	765.459	1327.44
1077.13	649.187	797.757	1480.86	749.31	1183.72
1120.74	629.808	789.683	1487.32	736.391	1174.03
1123.97	624.964	796.142	1482.47	725.087	1159.49
1130.43	647.572	797.757	1471.17	729.932	1151.42
1157.88	645.957	802.602	1469.55	718.627	1149.8
1291.91	644.342	786.453	1461.48	710.553	1115.89
1293.53	642.727	776.764	1508.31	720.242	1119.12
1322.6	636.268	757.385	1524.46	717.013	1125.58
1345.21	631.423	765.459	1542.22	747.696	1102.97
1400.11	633.038	760.615	1500.24	738.006	1127.2
1413.03	742.851	768.689	1535.76	683.1	1140.11
1424.34	744.466	784.838	1542.22	676.64	1130.43
1409.8	754.155	781.608	1534.15	671.796	1120.74
1396.88	760.615	789.683	1564.83	675.025	1107.82
1398.5	765.459	775.149	1568.06	660.491	1093.28
1480.86	733.162	797.757	1564.83	683.1	1046.45
1472.78	691.174	786.453	1613.28	697.634	1010.92
1480.86	683.1	807.447	1600.36	694.404	1004.46
1501.85	684.715	834.9	1608.43	620.119	988.315
1495.39	697.634	884.961	1601.97	621.734	994.774
1485.7	704.093	859.123	1687.56	629.808	978.625
1506.7	705.708	833.285	1715.02	626.579	994.774
[truncated: 8,984 more rows]

## Sheet: Figure 1—figure supplement 4B
DUP4	DUP5	DUPR	Chr4	Chr5	ChrR
31.4998	25.1354	29.649	7.13975	5.53038	7.41042
35.7646	26.8838	29.927	17.7982	9.06368	23.7528
32.9628	25.8158	30.5854	18.3688	8.9759	19.071
27.9811	32.2971	27.0667	19.6782	6.6862	32.2313
28.4932	36.0353	31.4778	21.7338	10.022	29.3125
29.7221	45.1794	45.0916	18.1859	12.5824	23.0359
33.2701	41.5291	70.2929	16.3497	12.7433	23.5407
40.5269	34.1552	70.11	17.864	10.9071	19.9416
30.7975	34.9526	65.3331	17.0666	9.14415	17.3593
32.3776	38.8956	52.7142	20.9218	11.4119	28.6687
31.8582	39.6783	52.246	20.2342	9.67817	31.8216
42.8605	31.69	66.8255	17.1764	17.4544	29.0272
50.5196	32.758	82.2608	15.6767	54.0383	33.8041
47.0375	39.2979	59.5613	15.3329	70.9147	25.9182
34.3089	44.3308	60.0149	14.5721	64.2066	24.36
33.4603	39.4149	50.5562	20.5268	70.4539	30.3805
39.1443	37.9446	46.7742	19.7294	71.5804	26.4303
36.5985	39.1735	49.9271	16.6862	73.4678	30.9731
33.0726	36.6644	51.0902	14.0527	84.7773	38.3835
31.4339	33.2701	49.8759	17.0886	76.072	33.1603
24.6014	41.3023	50.4757	18.3468	70.6221	30.0879
33.6212	37.1618	52.7581	18.5882	61.7925	36.7668
34.5942	40.7024	47.8056	17.0813	68.2373	36.4522
34.7697	43.9066	41.8875	17.0081	65.0478	37.4179
32.4654	44.66	43.475	18.1786	67.0595	36.7814
34.5356	45.4062	40.1831	18.4712	65.1283	28.6395
33.6358	41.1706	48.047	19.7441	71.4341	23.9138
33.1969	31.7924	51.1634	20.9877	80.0442	28.3249
37.8275	29.2101	45.0039	18.0981	78.9469	22.4653
35.2233	39.5247	41.7485	21.6972	81.4341	18.3761
40.3879	41.7705	46.4669	22.5678	69.1956	16.7448
38.9833	38.3908	47.2497	21.8582	58.9249	17.9518
30.3366	48.0982	48.2519	21.2803	67.8277	19.1515
25.6987	38.5371	52.2314	20.3585	48.4859	21.1705
28.1932	35.6768	48.5372	19.2027	22.3776	18.7784
28.837	40.1684	47.4325	17.9445	17.0301	18.3176
33.8992	40.0953	46.2987	20.8852	18.0249	19.5026
33.8407	38.7493	42.3923	23.6212	20.6511	21.7484
36.2035	34.5283	49.7003	27.074	19.649	20.3293
39.5539	38.9541	52.0192	21.1852	19.4588	20.834
37.0448	38.025	48.4786	22.597	17.2642	22.0703
34.8868	35.5817	55.5672	26.1303	18.0396	22.1654
30.2489	36.423	56.0207	21.3388	21.9386	21.4193
32.8604	38.4054	53.4018	21.4924	23.0652	23.3944
36.6717	41.7997	34.9965	21.5582	25.333	22.0776
37.5495	47.4179	40.1318	23.2335	25.2891	24.4039
37.7397	45.6695	46.5108	22.3629	19.2466	20.6877
35.8012	46.8181	44.8868	20.3293	18.0542	18.281
38.8005	44.7039	35.7865	25.0111	24.0601	17.1617
36.5108	38.3396	39.7002	25.7134	22.2239	17.0959
36.3718	34.7843	54.4991	19.4807	23.8114	20.8121
34.9892	34.8209	52.0339	20.8487	20.8999	23.9869
28.9175	31.5949	53.0727	21.3095	23.7163	25.2525
29.8977	31.3242	57.2278	24.4917	22.3117	22.458
36.5327	29.7807	51.6242	22.1435	21.7777	19.2247
32.4873	21.6826	50.1977	21.4193	22.3995	22.3337
26.5473	23.2481	48.0031	17.4763	20.8633	25.3842
25.5817	28.7785	36.8107	20.6511	21.2876	23.0359
31.3974	31.9094	27.0374	20.5048	23.3798	22.6043
34.2723	41.3681	40.7024	20.1171	20.0732	22.7799
35.8085	37.2862	41.6022	22.6702	22.1215	20.7462
37.3155	39.7661	46.5401	23.6285	17.2129	17.608
34.9599	45.3623	49.5613	21.1559	20.5999	20.6877
29.7221	37.5861	50.1392	24.8794	21.1559	19.6563
29.9343	37.3301	40.6878	26.3059	18.9686	19.2759
31.4925	35.3549	43.2116	22.8677	14.2064	20.5341
30.6146	35.4647	44.9307	22.085	17.8567	19.0418
26.1157	37.5569	43.9212	25.1793	20.7901	20.1391
30.7975	37.3081	48.5664	21.946	24.638	20.6146
33.9138	44.3747	46.4011	21.6607	22.7068	18.142
34.5356	40.9731	41.7046	19.766	16.379	18.9247
35.0916	35.216	39.7515	18.9833	19.488	25.4061
36.9424	41.1779	40.7683	20.1903	21.5802	23.4383
35.2598	35.889	45.9695	21.4558	22.6775	17.9225
30.995	32.0411	50.0587	23.8699	22.1142	22.8238
32.4288	38.4347	56.1231	24.5356	22.1654	24.1186
41.7924	45.5159	58.7493	23.0872	22.9116	22.3776
42.919	41.1999	51.1121	24.4551	23.0286	24.4259
36.679	38.7346	44.3455	27.0301	23.5041	22.7506
39.3564	44.5869	41.2218	24.8721	22.2532	22.2166
38.0762	41.1853	57.1912	18.9467	24.0016	22.5019
31.0023	36.6205	61.6974	17.6592	19.4075	25.5744
29.3344	34.8868	52.1875	18.8004	22.6921	25.7426
31.3461	32.8531	42.9556	22.7506	24.1332	21.2217
29.3125	39.1516	54.2285	22.1727	23.7309	18.5151
31.0023	41.69	50.1612	24.4405	21.3168	23.9723
35.0331	39.1516	55.0697	23.0945	23.3212	23.3871
30.4976	38.6907	52.9556	20.6073	22.9408	21.1486
29.2101	37.6446	41.5291	13.387	26.7302	23.3578
26.3571	34.1187	41.6388	19.2247	25.3183	25.9255
28.4127	35.0404	39.6125	22.8165	20.1025	22.6117
32.2679	37.6007	34.3966	21.1632	20.6658	21.0242
32.619	40.5049	34.1552	20.6658	19.9708	20.1025
30.6	43.0872	41.573	23.9211	20.2634	17.6519
27.2423	40.2782	51.2072	22.0996	22.0118	17.9664
27.0594	33.7236	47.6154	16.518	20.7462	16.8106
30.8414		47.5276	17.4251	21.6095	17.9225
29.5466		48.5445	16.7813	20.5048	16.1376
27.2349		47.4106	19.8245	21.6314	23.6139
35.0038		42.6044	20.3	23.4602	21.7631
37.769		45.8085	18.6468	24.3234	20.1171
34.2284		49.8539	19.7514	22.6043	18.537
31.4193		48.7127	22.7433	25.2379	20.3585
35.9475		46.028	18.6248	25.4939	21.5144
29.3052		49.6125	25.7572	22.8384	21.4851
30.878		49.6418	25.845	21.3681	20.4171
38.6176		48.9907	23.8479	23.1384	20.6731
40.5049		47.1399	17.8933	20.5561	18.1127
40.6073		48.3104	19.8904	20.7536	22.0411
36.1816		54.7991	20.9657	20.4317	22.6555
31.39		51.0902	15.3475	17.9152	19.0198
37.6958		45.9183	14.3673	18.2737	20.1318
39.3564		44.1626	19.0125	19.1296	25.9036
37.1618		47.3082	19.2832	22.7799	24.5283
30.4171		46.0792	17.9591	18.2664	20.8779
32.5971		44.9673	22.4361	17.0154	24.2064
35.4062		43.2774	22.8677	17.33	20.9218
34.5649		37.1106	23.6212	18.0615	17.3593
31.1633		39.3711	22.4946	19.0564	17.725
33.6944		45.1282	27.0155	21.3315	18.932
27.9592		53.1312	23.5846	20.461	22.2971
26.7156		47.9007	27.2057	23.4602	26.0572
35.7646		48.7639	24.3015	21.6314	24.1844
32.5605		51.9168	18.6394	23.6212	21.7484
34.3015		52.8751	19.0637	20.6292	23.709
30.7829		51.039	21.8874	17.5421	21.2583
31.0535		53.5774	21.1193	21.7704	24.3161
32.6849		60.6147	22.8457	18.6321	27.0301
33.014		63.614	24.6526	18.1347	22.7287
36.0645		49.9929	20.5122	20.4097	23.9211
33.9065		39.276	18.2444	25.8158	15.1866
32.48		48.8078	19.1222	22.9921	18.9759
33.6358		54.9673	22.6848	23.8187	26.4156
34.8136		53.1239	28.4566	19.6782	25.4061
38.6468		52.4801	28.7199	17.5495	22.6336
36.1011		42.6703	27.7543	18.4639	24.1332
34.4991		38.0543	27.2349	22.2678	22.6555
30.4171		46.8546	27.2203	24.4259	20.5561
28.9467		43.5262	26.9131	21.1559	22.6629
31.0682		46.2036	27.7543	19.9635	22.5604
34.4405		48.1275	28.303	23.57	26.4888
30.0879		49.9271	27.8275	24.0381	25.0769
35.5817		52.6923	26.379	21.4193	19.883
34.9965		67.6082	20.8487	19.6124	20.0513
36.6205		48.1933	21.0974	20.8999	19.9928
37.2642		41.8436	19.6124	23.2774	19.1954
30.0513		34.3162	17.5568	20.9511	19.7002
32.9482		38.2006	18.0396	21.9313	21.5582
27.1984		45.9256	21.6241	23.2261	20.0001
35.6256		37.3886	23.6724	22.875	18.7638
37.6666		37.2277	23.6797	21.6021	19.5026
34.1918		45.8524	25.1501	19.3051	22.6775
33.431		42.7654	23.131	20.439	25.4281
38.6249		48.4713	21.8801	18.9174	20.6731
36.9204		47.0156	25.5085	19.6709	21.8216
36.6863		38.4859	28.1055	23.0506	21.3754
36.423		31.7339	24.3015	23.7894	20.2854
40.6147		37.4837	25.0915	21.4266	18.4566
43.2628		36.6059	22.6848	21.0608	17.864
44.404		42.2899	20.8633	19.8172	23.1896
39.8027		53.8773	20.7097	19.2393	26.4888
35.611		54.1919	20.022	18.398	26.2181
31.9606		46.0938	20.3439	19.9855	22.6555
32.3922		47.5203	23.4895	21.2803	24.4112
32.3264		50.6001	26.3132	23.0798	24.3308
35.6476		56.3353	26.5692	21.1852	24.9087
31.4998		52.2826	25.4354	18.7711	21.251
34.7551		45.9402	24.7916	19.3344	23.6065
36.7814		41.4632	24.082	25.2817	24.5868
29.7734		46.4523	20.1391	25.2891	24.4917
34.6819		41.5218	17.9006	23.5261	23.9138
41.5144		30.717	20.2195	20.4317	21.1413
38.2591		28.0981	22.7872	18.1566	19.2027
32.7141		29.8465	20.1757	19.6636	23.8699
36.2547		32.2606	22.9774	22.2971	22.8896
32.1581		33.9723	21.9899	21.6826	16.3571
28.442		34.2869	19.1515	21.5656	20.6438
25.6914		22.2313	17.2568	20.4463	22.5678
30.8341		31.5876	16.8838	23.3871	23.1164
36.006		36.2328	20.7389	25.7134	22.9994
39.0784		31.7851	25.6987	25.0477	23.3359
38.976		37.1545	24.6161	27.5788	18.5663
39.3125		49.4223	23.0433	27.3886	20.2708
37.9226		44.7917	22.9847	23.4017	18.8955
35.889		46.6571	21.5509	23.2335	19.4514
37.1618		45.75	22.3483	25.4354	16.3571
41.1926		46.1085	24.1918	26.1888	19.5465
38.3908		40.7902	22.5604	24.0894	25.6987
30.6805		45.4501	19.9123	22.5897	25.8377
34.5649		51.5876	20.2634	17.3446	20.3146
37.6154		49.4296	24.2064	16.9423	23.5114
35.9987		50.1392	24.3308	19.6197	22.5751
33.5846		60.7391	25.8011	20.1171	20.7389
27.8787		51.2731	23.9357	25.8377	21.0754
32.3045		55.3477	18.5663	28.5224	23.4602
32.2094		48.2738	19.371	28.5517	26.9716
30.461		43.7822	19.4734	25.8377	26.8619
30.4903		38.3908	20.161	24.9526	21.134
29.6563		35.077	21.7192	23.5773	23.4602
34.8575		39.0419	20.9072	21.8362	25.0184
31.1925		41.7705	22.758	19.6636	22.8311
25.3695		44.1406	23.1164	22.7799	22.9043
26.9789		44.4113	21.5144	23.5626	27.4983
30.0587		39.927	22.3703	23.4529	25.7207
27.4178		39.2028	22.319	20.8048	19.8172
33.4969		41.9314	20.6219	25.7938	21.1559
35.3842		36.7156	21.0242	24.243	21.7484
38.2079		44.6893	22.0484	23.6431	23.3139
31.69		54.1261	20.834	18.0469	26.1157
34.5503		56.2402	21.1413	20.856	25.5817
33.7748		50.6074	21.9386	23.6504	21.8362
40.2855		55.9403	22.9921	27.2203	20.3659
37.3667		53.2482	21.2656	30.5195	19.1808
38.8151		44.3601	26.5619	27.3886	18.3834
36.9936		47.93	28.9467	26.4961	16.5765
41.6681		52.9337	22.2825	25.033	23.1457
43.1604		62.407	22.4361	29.8172	23.7894
42.1436		66.6572	22.1727	26.0352	18.698
47.1399		57.1107	22.4288	23.1237	22.5751
37.5642		55.2599	21.0828	19.5246	22.458
32.1143		41.6534	21.2071	17.586	24.4478
31.3754		40.7902	23.3139	14.8428	24.638
35.3696		39.788	24.3015	20.973	24.1186
32.897		40.8122	26.679	24.104	25.2744
32.6702		43.7529	24.0016	23.0067	27.0959
34.2869		43.7749	23.5626	23.5773	28.0323
29.5832		43.0068	19.6124	25.9182	24.5063
27.2642		47.9373	17.9884	21.7923	23.9723
33.6505		52.3411	19.0491	16.7082	22.6848
32.4069		49.7295	19.1954	18.2371	22.6482
32.0265		49.2979	19.071	18.6102	19.8977
35.8963		47.9373	23.27	20.995	19.5246
31.4266		43.058	23.7309	21.7192	21.7119
25.9548		42.1728	21.2217	19.5173	21.8435
34.7624		47.235	23.57	20.9291	17.8055
33.9358		40.6293	27.4983	23.2847	24.1698
33.2554		36.6132	24.4112	22.9116	23.8187
31.8802		49.6564	23.431	23.1457	20.2927
30.9658		57.4618	20.461	24.916	20.9145
33.965		56.7961	20.1025	23.965	23.4822
34.3308		51.7778	21.5875	25.3183	25.9548
30.578		42.6703	17.1325	19.3929	21.4266
24.4332		35.45	14.2502	23.3651	19.8099
24.7989		41.434	17.7835	25.3256	19.1588
33.8919		35.4427	21.5802	25.9255	21.9167
32.7653		34.8209	25.845	23.3139	23.5407
26.7302		35.4574	22.3776	20.5341	19.649
25.1793		34.0089	20.322	19.6124	25.5451
29.232		40.1684	19.4734	21.507	23.2408
27.7763		46.0719	18.003	25.4354	22.4434
43.1019		44.0309	17.0081	27.5714	25.9767
43.6725		46.3938	18.8808	23.2627	24.1113
35.7207		41.2291	24.2357	21.8728	19.8684
27.6227		46.6059	23.0945	19.8391	18.6906
29.5246		47.4618	19.0564	15.7206	23.4675
33.6139		52.8093	18.2078	18.0762	24.1479
33.7163		50.6147	19.5904	19.3271	28.9906
36.3059		46.5913	19.093	20.5195	33.1823
35.1062		43.6578	20.8487	21.6095	31.1267
37.5495		42.0997	24.2576	23.1091	28.1494
34.5356		37.3813	23.292	22.4873	20.3585
31.2364		47.6081	16.2839	23.1457	27.5422
27.7324		45.355	20.9803	21.5802	26.7887
28.2591		41.6461	21.5144	22.897	22.3629
34.265		42.8458	26.6205	24.4771	26.0864
33.453		53.3141	26.2401	28.3688	29.8099
34.404		55.6476	23.3871	25.1574	25.4573
32.0118		37.5495	22.3264	24.6526	26.4668
28.1128		23.8187	17.8786	21.5509	26.3498
31.251		30.2489	16.4668	19.9708	19.3271
35.4574		53.3506	18.2883	20.044	22.4653
32.1581		49.6637	17.9372	21.6241	19.5539
28.2591		44.382	18.7419	22.6629	22.1947
25.6402		40.2855	18.6541	23.8479	24.7916
29.7075		48.1787	19.9855	21.9313	23.6504
34.7697		49.7734	18.0908	24.0601	25.3768
30.9584		43.9066	24.4112	26.2254	24.9306
29.4588		44.7844	25.5305	27.9665	21.39
35.2233		45.5671	20.4171	26.1888	22.202
35.9621		45.9475	19.7441	20.5341	21.6095
34.6746		43.7822	21.2071	20.973	24.5941
34.9526		31.2584	18.5004	27.0959	25.6256
31.1998		47.7764	22.7726	27.1252	22.758
35.4062		57.7618	24.9233	23.3432	21.3754
35.1794		49.9271	22.8238	21.4632	22.2386
34.3089		36.2401	23.27	21.0462	24.382
29.0052		30.8121	19.7294	26.2254	23.8626
27.4471		28.0981	22.2386	24.8794	22.6117
33.3652		33.7602	25.4719	23.9796	25.0842
37.491		43.3286	17.2495	25.5232	27.1398
30.439		42.6849	19.071	21.1632	25.9401
37.2204		38.7566	19.3637	20.8633	21.0169
36.2694		39.4223	18.6687	20.4756	23.8406
36.1743		35.3988	20.0074	18.259	19.2027
36.6205		43.6944	23.5846	18.5078	20.5414
37.4105		36.4449	21.3315	19.883	23.2261
36.0938		29.232	21.5436	23.8772	26.9789
41.6169		32.0923	20.7243	24.8355	29.3344
45.8378		36.3937	18.4639	25.6109	29.3271
39.5686		43.5042	17.074	24.8428	25.0915
36.0865		47.2058	20.1757	27.2788	28.7858
41.4559		41.8583	21.5656	27.2569	29.1442
38.2518		45.3404	20.322	20.834	23.9577
30.7829		40.8268	25.4719	19.2832	23.5553
35.1428		41.5364	22.6555	18.8735	24.2357
38.9102		50.5489	21.0828	17.8348	27.4763
37.652		41.1121	21.4778	17.4836	29.7953
31.5071		49.393	20.2122	17.1764	25.1501
37.7105		52.2168	21.8509	21.1266	21.8509
40.7902		48.5664	21.2291	20.2342	23.1749
32.8238		43.4603	19.6051	23.0652	28.8736
32.2898		41.551	21.3754	22.6555	26.8619
42.2972		47.4764	23.1457	21.2803	21.807
36.7814		52.2241	20.5561	20.6438	24.6161
34.1113		48.4201	17.3812	21.134	22.0776
39.5466		50.9732	17.9079	22.7799	22.7068
39.7734		50.7683	15.5963	22.5312	24.9379
31.0243		49.1516	17.3885	24.6014	20.0001
28.0689		45.772	19.5246	23.3432	18.4858
32.5532		47.4472	23.0286	23.0067	18.6468
32.9994		40.0148	20.834	23.7163	21.946
32.7653		40.6732	21.2437	22.5604	22.8604
34.4698		38.5517	22.202	18.7492	25.9109
36.9936		34.7697	22.2166	19.0125	23.8114
39.4149		31.3023	20.8999	20.2269	23.3212
35.9255		44.5576	21.8143	21.3754	25.9109
40.0367		43.987	20.8633	24.3381	27.7324
43.5335		46.1085	18.3688	24.1918	25.7865
41.573		45.3257	20.3293	20.5707	24.3673
36.562		47.2131	24.4478	17.1471	23.7528
32.5532		49.393	23.6943	15.1939	19.9416
35.9694		55.5452	24.638	15.6475	17.5933
45.5159		53.1165	21.0828	17.747	20.2342
39.9855		50.9585	21.6095	17.7835	24.2283
39.3637		47.1692	19.8904	20.3951	25.5451
32.8458		44.2577	21.1852	16.7301	28.0689
41.0024		44.8137	21.9533	15.3841	29.1003
42.9775		43.4676	26.401	21.7411	24.6161
34.9599		43.7895	26.796	22.5531	23.4749
34.7917		46.8107	21.7997	22.6921	22.5312
38.3176		54.4479	21.668	22.9043	26.0352
39.0272		52.9263	21.39	23.3798	24.2942
40.0002		57.1912	23.1823	25.2379	18.698
37.235		64.3163	26.1815	25.9401	20.0147
36.5693		63.6799	25.7207	21.668	22.6117
28.6614		54.8576	26.7156	14.221	23.5919
28.2518		36.9643	23.3066	16.0206	21.6021
28.6907			22.4141	24.3893	19.1003
31.7339			26.7887	25.7207	19.9855
30.9658			25.4427	22.8384	18.3249
33.175			24.9233	22.6848	19.4295
36.4084			26.4888	27.0082	17.725
31.0462			21.9679	25.9474	23.3139
28.2518			18.9101	23.7016	31.1998
27.769			17.4617	23.9065	30.0367
34.5722			21.1486	24.6892	29.6709
35.0331			23.0872	23.3286	29.232
29.4881			21.0608	23.2774	29.0857
36.1669			22.597	20.9072	31.0389
31.829			23.943	23.7016	23.5261
32.3776			19.9196	21.8216	22.6629
36.9497			20.7755	19.3563	21.1925
32.1069			18.4273	21.7777	23.7967
28.6175			20.1757	21.785	20.7024
32.5971			20.6219	20.0074	22.9921
29.7734			24.0089	23.7894	24.5941
27.7836			22.6994	23.6139	25.589
33.7822			24.3454	19.9855	27.1033
35.5963			22.4215	18.1932	28.4859
35.6037			23.4675	19.4807	25.5597
35.9987			23.6358	21.2876	25.9548
32.3045			24.6673	20.0074	24.8501
32.5459			22.4215	23.6431	24.2649
32.1069			25.2744	26.1303	21.4339
35.9987			22.0411	27.9372	26.2035
43.6066			20.6585	24.3893	26.4229
33.0945			24.5868	26.2035	22.9701
35.3403			23.5846	24.3746	22.1947
31.017			23.7748	23.1091	17.9006
28.2445			20.3146	23.9577	11.0973
27.4178			21.4778	25.4939	16.8838
30.2562			26.5912	27.3886	18.7565
34.0894			22.0045	28.5224	20.3878
33.9211			17.2715	27.0813	21.2876
38.2811			18.676	29.115	21.8728
38.1275			16.1961	26.6131	21.924
31.4193			21.6021	20.6877	25.6256
32.2679			21.9825	23.5334	25.4939
35.9987			20.9803	24.9745	22.4434
39.1443			19.883	26.3864	23.8041
32.2313			19.3929	19.0198	22.8384
35.472			22.5751	18.281	21.0315
35.216			25.6987	19.4075	24.9233
31.5583			30.3878	22.2752	27.2203
37.4471			27.1179	26.4668	23.5407
39.7002			20.3073	27.0155	22.3556
37.8422			18.0908	28.1859	27.3666
37.9007			18.5078	27.33	24.9818
29.2686			19.8318	27.6885	26.9131
32.5751			20.9438	24.6673	26.5985
37.4471			25.4573	27.3154	26.5912
33.9577			23.7821	30.0879	23.7967
34.0236			24.8867	24.4185	22.3922
37.7909			25.1062	20.3512	24.1625
30.3878			21.1047	21.0901	25.867
31.0096			21.7923	21.0462	26.3425
31.551			19.8757	22.2093	27.3008
31.4851			20.1683	24.9087	30.0294
33.292			24.6307	25.3988	29.8392
32.4654			25.2013	23.7455	29.627
32.6117			27.1398	25.7426	31.807
35.589			22.0411	19.0784	24.7624
38.6834			22.0191	25.45	16.4595
36.3206			26.7594	24.4332	20.1098
30.8633			27.1179	25.4134	24.1625
32.9555			26.379	21.9313	22.9189
34.1845			27.074	23.0433	24.0747
35.75			22.3849	26.3132	20.995
38.1421			19.2978	24.1332	18.8296
41.0316			21.0023	25.0989	22.2093
36.6644			23.6943	23.4529	23.6212
29.4954			21.0096	25.1281	21.4266
32.8312			20.5341	24.1113	19.1222
36.0353			20.3805	23.1018	20.6292
38.9614			16.0864	26.3937	19.1515
35.2379			16.9642	25.6914	18.7638
42.0192			23.1164	24.9672	20.7316
39.6929			23.2115	20.6877	23.6065
30.5634			23.4383	21.2803	24.8721
30.3659			19.7879	26.4156	26.8692
39.532			23.3724	26.4595	26.7156
39.2174			24.6087	26.3425	20.8194
44.4698			26.1523	28.3322	18.0396
44.2357			27.8641	27.0082	17.5787
40.066			22.0045	25.6768	20.2854
33.9797			22.319	27.4178	20.7828
33.8699			26.0791	27.7616	20.3073
33.6651			20.8999	24.9379	22.2532
40.1757			20.1098	26.4156	22.6555
38.1567			16.6058	26.7156	23.3505
36.9131			17.5641	29.9928	24.1771
33.9577			16.6936	26.4376	22.9847
32.1289			17.5568	18.5443	21.6168
34.6527			15.4938	23.687	22.2166
39.0858			15.8157	27.3447	22.2971
37.6373			22.4288	25.2232	22.6117
31.4559			19.1881	25.7426	28.954
32.9994			22.8092	25.4939	26.3425
38.72			22.3849	20.995	19.9635
45.6403			25.8377	18.932	21.9167
44.0748			23.1969	22.4141	23.9284
43.2409			23.0945	19.21	22.2971
41.0682			25.1428	16.7228	19.4222
38.2299			25.6914	23.2847	21.0389
36.2913			24.5575	24.5502	20.8926
33.4749			25.7426	24.8794	21.1779
30.6366			26.262	28.2957	19.9416
36.6571			22.1215	24.9818	21.0315
33.4603			23.548	22.6409	23.8918
33.3579			25.4939	18.8443	25.2744
32.4069			23.3798	22.2239	20.578
32.3922			21.668	25.0915	18.7931
34.382			23.8041	24.2649	17.2349
33.987			24.6014	26.8765	15.5158
33.7163			23.3578	27.8787	18.3249
34.1772			23.7016	24.9891	19.0637
32.7873			23.0945	24.9379	19.0857
31.0609			25.1501	27.2715	18.3249
29.766			22.48	23.5114	21.3973
29.788			19.9269	24.1625	16.8106
32.224			19.4661	23.1018	17.4763
32.0192			18.6833	24.6014	20.4244
34.0309			22.4507	23.1896	22.4727
29.9197			22.4068	18.4931	23.6797
27.1618			21.946	19.8538	26.379
31.5437			21.2217	20.1903	27.6958
28.8224			22.0411	20.1537	28.815
35.9548			22.9043	23.0945	29.4734
43.1897			26.8253	23.8406	22.7141
39.9124			22.7433	27.1179	21.4193
35.3403			22.3337	24.0162	20.5268
30.5195			26.2254	20.8706	26.0352
31.6095			24.7477	21.3973	32.7873
30.8121			21.8874	19.3856	26.2254
31.7485			25.4134	18.3102	24.6892
30.3366			24.0747	18.537	25.4646
36.7156			26.3352	21.3607	30.4464
38.5737			26.0864	26.8399	22.4873
37.5495			24.8355	27.3154	19.883
32.6995			23.4383	21.9533	20.2049
31.4486			32.9775	22.736	23.3432
30.8194			34.4405	23.5114	25.0769
30.3586			29.9343	27.0228	23.8918
30.5122			27.2569	28.164	24.4624
33.9797			23.5407	26.2181	23.5041
33.5627			22.3703	20.6658	24.3966
34.5503			17.3154	20.7682	24.9379
35.8743			21.1486	24.7697	23.9869
34.7697			17.1983	25.7865	26.6205
30.1318			12.5897	24.7477	22.5092
32.5459			15.0988	22.0484	24.0235
43.8261			17.9957	20.5414	23.0506
43.8627			18.9101	25.7207	19.0857
34.4405			22.7653	22.6409	18.6687
33.3652			22.0337	21.8728	23.1603
38.5591			22.8896	26.8399	24.8282
36.0206			23.3871	26.3937	26.0133
31.3681			23.3212	20.9584	26.9496
37.7105			21.1559	16.3717	25.4573
39.9855			20.2561	17.6884	26.4083
33.2481			20.7609	21.5217	25.9474
28.7419			18.5517	20.6438	29.6124
30.5122			23.8333	19.3344	26.0352
33.8114			23.5114	20.0074	24.0967
36.423			21.0023	25.1354	20.5707
33.5334			24.5356	24.0894	21.0023
35.3988			23.1823	22.4215	23.1676
33.3505			21.5509	23.0725	21.9752
31.9606			20.6658	19.9781	21.1998
29.627			17.5933	21.7923	21.5144
29.8977			19.6416	21.8948	19.1442
27.9006			22.3556	23.4163	21.3168
33.1165			24.8794	24.8282	17.2934
37.3374			16.7375	23.409	18.3395
42.6849			19.9342	23.8553	22.6775
44.1553			23.6504	27.2715	25.1062
33.7895			25.867	26.6863	25.3695
35.0184			24.1406	29.7368	22.9408
35.6695			24.755	31.6607	22.1727
31.0096			21.5802	27.3886	21.9021
30.2708			21.946	27.3008	21.5144
28.3908			23.3724	27.9445	24.382
35.0331			25.2817	27.1691	23.9577
36.6205			26.679	27.1252	25.1428
32.4361			28.559	26.9057	24.3673
32.1216			22.1654	23.8992	24.6014
32.6117			23.27	19.7221	25.6256
30.0367			22.4141	29.6417	24.7624
36.3864			22.6263	27.9079	25.8597
33.5334			21.9606	23.6285	32.0192
28.1567			22.0118	21.0901	39.1443
35.9694			20.0586	22.7945	25.6256
40.1392			21.7338	22.3995	25.2817
43.197			23.943	19.3637	24.1844
40.9292			24.9599	22.4068	23.943
39.2028			24.3234	26.7009	24.243
35.194			23.2774	21.5656	22.8165
34.0162			24.6746	19.9562	23.0725
33.2993			23.0945	22.6555	25.7134
27.8494			22.6702	24.9452	27.3666
25.4866			22.5824	25.3183	26.4522
23.6065			19.627	27.6373	24.5795
33.9431			21.5948	20.8926	24.221
36.8034			21.3095	26.0864	23.3286
33.7602			25.2086	22.9189	22.8896
37.6373			25.7938	17.7762	21.8216
34.9014			24.3966	18.0688	23.5919
26.123			22.9189	20.6585	22.0923
28.8077			19.9928	21.1632	23.548
29.4003			24.3161	27.0813	24.1918
29.2028			24.9233	29.1296	23.4895
27.0008			25.4939	30.4171	23.6139
31.946			26.379	31.9094	23.5553
35.5963			28.0177	28.7492	23.9869
28.5444			27.4325	24.0381	25.45
31.0755			23.709	27.2349	19.2759
26.0352			23.943	30.9658	17.4178
24.777			24.5136	26.2913	21.2217
32.7434			22.9482	25.2159	24.0235
28.164			25.8085	29.6563	27.3593
31.69			29.8465	28.837	28.0981
29.1077			24.9745	30.0587	24.6526
32.7946			23.5846	31.4851	20.6073
32.1216			24.777	22.5166	19.8391
33.1384			22.8457	24.916	21.4558
39.1004			24.5429	21.6899	22.1801
43.6578			21.4046	19.6855	17.4982
38.7712			20.8048	16.123	12.9262
36.8838			23.1603	20.8048	16.2034
43.5262			22.1362	20.1318	24.9672
42.5313			21.924	22.7506	35.2233
34.777			25.4354	22.1069	24.4112
37.8202			26.6351	23.1457	20.461
33.014			23.7455	26.8472	20.6365
29.0784			23.6285	24.4478	19.8611
33.4895			24.1479	20.022	19.9489
36.0645			23.4017	19.5758	23.0652
39.1296			27.2057	20.4683	32.224
36.2328			23.7309	20.3512	32.9921
38.9102			23.292	19.2173	22.0484
36.0572			23.1749	22.8238	18.7199
35.6549			24.5648	27.1179	10.9803
37.8714			22.6629	26.5327	11.624
39.6271			25.0477	24.5063	10.6804
36.8838			24.2576	23.4602	12.6994
38.1494			18.8735	22.5751	19.4441
39.1004			17.6519	22.4507	24.5356
36.8326			20.3	23.0506	27.9153
35.6183			31.4998	20.7462	25.5378
43.0653			35.7646	20.695	23.6943
41.8729			32.9628	21.7484	20.0513
37.0228			27.9811	23.7455	20.1464
34.9453			28.4932	24.1918	25.5378
31.4559			29.7221	25.2086	24.0967
38.6615			33.2701	26.3205	19.6343
38.3542			40.5269	27.4325	20.7536
38.2006			30.7975	22.9043	25.1793
42.1289			32.3776	24.382	22.3995
35.4354			31.8582	26.657	18.0469
32.8751			42.8605	21.3461	18.1274
37.2716			50.5196	22.2605	26.1084
39.0126			47.0375	22.3703	22.0045
37.6081			34.3089	21.9021	21.7265
36.2401			33.4603	21.1486	26.4595
35.3623			39.1443	19.9269	29.9928
38.0689			36.5985	22.1801	23.2188
47.8641			33.0726	24.0674	24.1698
40.3879			31.4339	21.6168	24.0308
36.2108			24.6014	22.2386	22.2971
35.5744			33.6212	26.5619	21.8874
33.2554			34.5942	23.5334	21.6753
26.4522			34.7697	23.1384	22.9921
23.0798			32.4654	24.7477	20.5999
30.3293			34.5356	23.7894	17.3666
33.8992			33.6358	24.4844	23.1749
37.0375			33.1969	26.3278	26.3425
30.7097			37.8275	26.123	21.8948
23.8041			35.2233	27.5495	19.3637
32.0704			40.3879	29.6929	23.3505
35.9329			38.9833	33.4237	20.578
41.1633			30.3366	28.7638	21.7997
35.9987			25.6987	22.7141	17.7397
38.2957			28.1932	23.965	17.725
40.2928			28.837	23.7455	17.7543
43.6944			33.8992	24.5648	18.3615
33.9065			33.8407	21.1413	23.4675
35.6402			36.2035	25.5158	21.0096
27.0667			39.5539	24.521	15.5012
32.7361			37.0448	23.6651	14.6599
35.8524			34.8868	20.022	20.8487
33.4603			30.2489	20.6585	22.2386
30.1245			32.8604	21.1925	18.1054
35.4793			36.6717	21.924	19.766
34.4552			37.5495	21.0169	19.2686
36.9789			37.7397	22.5166	16.8252
39.1223			35.8012	20.5268	21.7192
34.0894			38.8005	21.5144	22.3629
32.1069			36.5108	21.3168	21.4924
31.0535			36.3718	21.6972	23.9796
31.3608			34.9892	22.4141	20.6365
35.9402			28.9175	21.9021	21.0828
38.4274			29.8977	27.074	20.8706
37.1106			36.5327	25.194	22.319
34.4844			32.4873	25.6475	24.521
31.1121			26.5473	24.6746	24.9672
25.9474			25.5817	24.7331	27.1033
21.4046			31.3974	23.8553	25.3768
27.2642			34.2723	22.0337	16.2254
29.8172			35.8085	22.1069	21.1925
32.7507			37.3155	24.4844	22.3117
30.8633			34.9599	23.1384	24.3893
31.134			29.7221	26.2693	23.2847
28.8516			29.9343	26.4595	20.8633
30.2269			31.4925	23.2042	17.6299
38.8517			30.6146	21.8216	17.4763
39.7295			26.1157	23.6431	20.7462
36.7741			30.7975	21.7046	22.3776
33.6651			33.9138	19.9342	22.8238
35.9109			34.5356	19.3198	22.48
38.998			35.0916	19.1222	19.3198
36.6498			36.9424	22.5458	18.6906
32.3483			35.2598	21.0974	22.2678
33.3725			30.995	24.6526	23.431
25.2817			32.4288	25.6768	21.5582
27.3227			41.7924	24.3527	22.0337
33.0652			42.919	27.6958	21.2803
32.78			36.679	28.9467	20.2342
37.63			39.3564	23.1237	22.6482
36.423			38.0762	18.5955	23.7309
38.2591			31.0023	32.2825	23.0652
41.4632			29.3344	28.0543	23.4529
29.7734			31.3461	25.589	19.1735
31.1267			29.3125	23.4822	18.1566
36.8838			31.0023	20.9584	22.4288
44.4698			35.0331	25.0403	24.8355
37.0228			30.4976	24.6746	25.1501
29.0052			29.2101	22.7068	19.2978
29.7368			26.3571	23.8114	21.0828
30.8633			28.4127	23.9211	23.2335
36.2767			32.2679	26.5473	21.3534
40.0441			32.619	23.8406	21.8216
41.7193			30.6	21.9752	22.1069
37.8275			27.2423	22.8238	23.2993
36.1304			27.0594	25.3842	19.0637
32.48			30.8414	17.9518	19.51
30.3074			29.5466	14.6818	21.4924
32.4288			27.2349	17.5787	18.3907
35.9036			35.0038	18.8955	20.322
35.9694			37.769	19.6709	19.9928
40.2635			34.2284	25.0696	19.5904
40.1831			31.4193	20.9218	20.3732
37.5861			35.9475	16.0718	24.894
32.7507			29.3052	15.5304	20.5853
32.7361			30.878	14.9818	18.9759
38.9468			38.6176	19.2832	24.4259
34.4405			40.5049	19.3417	22.5678
35.472			40.6073	17.8494	20.4975
40.7537			36.1816	16.0059	22.3849
44.5064			31.39	19.1296	22.1581
46.7156			37.6958	23.8699	22.8531
41.3608			39.3564	22.7141	22.1215
41.1487			37.1618	18.7857	25.0915
38.6542			30.4171	23.3359	26.957
37.9226			32.5971	23.4675	25.4719
42.2752			35.4062	23.7967	23.8626
37.8568			34.5649	23.131	20.695
35.7865			31.1633	24.8575	20.8487
33.826			33.6944	22.341	23.0213
37.2277			27.9592	21.7631	23.8041
37.3813			26.7156	22.8604	25.984
31.8582			35.7646	24.4917	23.2627
32.2532			32.5605	25.5744	23.3139
33.153			34.3015	28.4493	20.6146
34.777			30.7829	26.4522	17.9445
36.6863			31.0535	22.0996	20.9657
35.8597			32.6849	20.6292	21.529
29.2174			33.014	20.0879	20.2122
32.3337			36.0645	22.0191	17.0228
29.9123			33.9065	20.9803	17.33
30.3952			32.48	22.2898	23.1603
33.8553			33.6358	22.1947	25.2744
30.1245			34.8136	26.2254	25.1793
34.7843			38.6468	22.1581	20.3805
32.4581			36.1011	24.1625	18.1347
33.1311			34.4991	26.5912	20.5414
35.055			30.4171	25.3988	24.8867
35.2233			28.9467	25.0038	24.9672
33.7236			31.0682	24.8428	25.4573
31.6827			34.4405	21.2437	22.6555
33.3359			30.0879	20.0001	21.3534
44.7405			35.5817	21.9533	22.202
43.0141			34.9965	24.1625	22.7506
36.3206			36.6205	25.2452	22.2605
36.284			37.2642	22.5458	24.4771
35.055			30.0513	22.5824	21.7923
39.0931			32.9482	23.4895	23.6358
38.9395			27.1984	22.8531	19.8538
33.5481			35.6256	22.9774	26.5912
16.8399			37.6666	20.1318	27.2935
13.6138			34.1918	21.5656	25.333
17.9445			33.431	20.1537	25.8011
27.7616			38.6249	25.7938	23.8699
39.7076			36.9204	30.0806	24.1479
34.8941			36.6863	24.2649	25.7572
34.1918			36.423	23.2774	21.7704
37.2642			40.6147	26.1011	22.7872
27.0374			43.2628	23.3944	21.0023
25.1866			44.404	23.7675	21.3607
24.221			39.8027	26.8399	24.8794
26.006			35.611	23.4237	23.5846
29.1442			31.9606	20.856	23.2847
34.4552			32.3922	21.6753	23.0433
35.3696			32.3264	20.7682	26.2839
36.7814			35.6476	24.4478	25.0769
31.1047			31.4998	24.638	23.5846
27.2642			34.7551	25.0257	22.3044
27.3959			36.7814	20.6146	20.4536
28.2371			29.7734	18.0762	22.4141
33.3067			34.6819	21.5802	24.2064
32.6849			41.5144	20.1171	19.7148
37.7471			38.2591	21.1486	17.074
37.4325			32.7141	21.6387	20.1244
31.946			36.2547	23.7455	22.8531
34.1991			32.1581	25.8231	23.0286
40.0733			28.442	24.2064	21.134
36.8765			25.6914	25.1647	18.9613
37.096			30.8341	22.9921	18.7711
32.7873			36.006	23.5992	18.8589
39.8758			39.0784	23.8406	19.0491
40.739			38.976	21.5582	20.4463
41.3242			39.3125	17.0666	19.0857
39.8978			37.9226	19.4295	23.1603
34.8648			35.889	24.2137	24.8428
31.0535			37.1618	26.1011	19.7953
37.235			41.1926	24.9452	23.5992
37.0375			38.3908	24.382	22.0411
35.5817			30.6805	26.9496	21.1632
35.3403			34.5649	25.8597	20.2122
34.6966			37.6154	22.875	15.2378
39.2247			35.9987	26.3498	19.1369
40.1538			33.5846	20.9438	22.4653
27.2715			27.8787	23.8187	21.3681
25.2964			32.3045	20.9584	18.9174
23.5773			32.2094	21.5802	17.9225
22.6921			30.461	21.924	21.0535
18.2371			30.4903	18.6248	18.1274
16.4375			29.6563	19.3417	20.3878
15.2817			34.8575	19.9342	17.2495
18.0323			31.1925	21.8728	22.6775
33.9358			25.3695	21.4193	21.7484
47.2935			26.9789	19.6709	20.1098
42.4874			30.0587	21.4412	17.6299
29.393			27.4178	23.4163	18.9028
34.7039			33.4969	24.1186	20.8852
35.077			35.3842	21.3095	20.4536
39.3491			38.2079	21.1998	23.0652
35.7719			31.69	23.1676	22.8238
32.0118			34.5503	26.2913	25.845
35.3111			33.7748	22.4215	25.0477
36.701			40.2855	21.3607	21.9533
40.0367			37.3667	23.2188	23.292
39.949			38.8151	24.5868	25.706
35.2233			36.9936	28.0543	22.3922
31.5729			41.6681	27.5276	24.1552
36.8546			43.1604	28.3396	26.2986
38.1421			42.1436	30.7829	25.2452
41.5144			47.1399	32.8751	23.7602
38.3323			37.5642	24.1479	24.7258
32.0996			32.1143	23.7748	23.6065
29.1516			31.3754	27.9006	22.1435
30.461			35.3696	22.4653	26.5839
30.3439			32.897	24.894	28.0835
27.3886			32.6702	27.8933	23.1457
28.3542			34.2869	26.3937	20.0586
34.9672			29.5832	22.3117	24.0528
39.6198			27.2642	22.2605	24.6526
42.8751			33.6505	22.8823	24.6161
41.3974			32.4069	23.4456	20.5853
38.4054			32.0265	25.5305	22.0776
34.5356			35.8963	21.8362	22.2825
30.1538			31.4266	22.4361	21.807
28.7712			25.9548	29.3271	21.5436
34.8136			34.7624	27.1472	24.1552
31.9241			33.9358	27.0959	25.1501
32.2313			33.2554	22.7141	26.8984
38.2738			31.8802	20.834	25.9182
37.9007			30.9658	22.3337	21.1413
32.8238			33.965	21.1632	23.8406
30.8633			34.3308	20.5634	25.2744
36.9643			30.578	17.1764	25.1866
40.6805			24.4332	18.2298	26.1962
34.7917			24.7989	16.5253	25.845
34.7478			33.8919	15.7279	24.3527
33.3652			32.7653	18.4931	25.9621
35.7792			26.7302	17.9372	25.8231
34.0894			25.1793	20.1903	22.7433
32.1801			29.232	21.6899	24.5429
30.183			27.7763	22.6555	19.4588
32.2752			43.1019	19.9562	18.2444
33.709			43.6725	18.7711	19.9269
32.3922			35.7207	21.8435	19.5539
33.3652			27.6227	24.4551	19.5685
39.51			29.5246	24.6526	16.1303
37.491			33.6139	21.7923	22.8092
32.9555			33.7163	17.8567	23.5188
27.8348			36.3059	20.1025	22.2532
34.6819			35.1062	25.4207	20.5561
43.3213			37.5495	23.6139	17.6811
35.9767			34.5356	20.5561	17.864
34.4405			31.2364	21.0901	17.7762
33.3944			27.7324	19.4661	18.537
37.0082			28.2591	18.9247	23.292
36.0572			34.265	26.6131	26.3132
29.6783			33.453	26.8326	25.5451
27.1618			34.404	23.7967	25.984
30.1976			32.0118	25.6183	25.9255
32.0777			28.1128	28.6761	26.4888
33.2993			31.251	27.63	25.9036
28.7492			35.4574	29.7221	22.1362
33.2335			32.1581	21.5656	21.4558
34.3308			28.2591	22.0996	28.4932
39.3052			25.6402	27.7836	26.4595
37.1911			29.7075	30.1025	28.0908
33.1969			34.7697	23.5407	26.262
35.9621			30.9584	21.7777	27.5788
36.5547			29.4588	22.6117	20.2122
29.1735			35.2233	24.6307	22.6117
36.1231			35.9621	30.205	26.4522
39.6856			34.6746	31.017	25.7719
43.1384			34.9526	29.3491	23.8333
39.137			31.1998	26.4961	24.1332
39.6929			35.4062	24.1406	24.7624
37.8568			35.1794	23.3432	28.1567
28.3542			34.3089	28.7931	25.2817
36.0499			29.0052	24.8355	23.0872
38.5591			27.4471	24.0601	21.3461
34.6819			33.3652	26.123	23.3505
39.6125			37.491	24.0528	22.3922
43.5335			30.439	24.6746	29.093
40.5854			37.2204	22.3337	29.6051
40.1318			36.2694	24.4478	27.9153
31.4193			36.1743	25.1354	28.2664
28.5151			36.6205	25.8377	25.3842
32.3191			37.4105	27.1033	21.4997
32.7287			36.0938	24.499	23.7675
37.5715			41.6169	22.7506	22.5678
37.9592			45.8378	25.5744	20.161
34.5503			39.5686	27.3739	23.409
36.401			36.0865	23.3871	23.6724
35.2233			41.4559	15.3037	22.2386
39.1516			38.2518	20.4244	23.8406
44.8795			30.7829	23.9723	26.0425
37.1545			35.1428	26.8253	23.6577
38.9468			38.9102	23.2408	23.7236
43.4311			37.652	23.4529	27.8055
40.622			31.5071	22.0337	23.3578
40.2269			37.7105	22.7799	22.8019
39.3418			40.7902	19.6855	25.4939
42.1143			32.8238	20.0074	23.7163
41.7193			32.2898	18.6321	19.1222
38.1275			42.2972	15.984	20.9584
36.1011			36.7814	19.1735	24.8575
42.8019			34.1113	22.6409	24.4844
37.5056			39.5466	27.0082	20.6877
43.5847			39.7734	24.5722	22.9555
44.8137			31.0243	21.4851	22.6994
46.7961			28.0689	21.5217	20.3073
48.5225			32.5532	20.3585	20.4683
37.1472			32.9994	20.0074	26.7448
39.3125			32.7653	18.9247	26.6278
39.9197			34.4698	21.4558	27.7397
39.5247			36.9936	21.134	26.2254
39.8904			39.4149	17.4105	26.0718
44.821			35.9255	19.627	24.6673
42.2387			40.0367	19.3783	25.4281
39.4296			43.5335	18.003	30.6219
37.6081			41.573	20.4024	27.074
45.8597			36.562	20.8999	24.382
47.9153			32.5532	22.0118	30.1611
43.0799			35.9694	20.9803	27.6739
38.3396			45.5159	27.2423	26.2986
43.0726			39.9855	26.2474	24.3234
41.4559			39.3637	27.1691	27.2423
35.1135			32.8458	22.7141	26.2913
35.5378			41.0024	23.5553	24.0747
36.7741			42.9775	23.826	19.4807
37.7324			34.9599	21.3534	24.1259
35.3257			34.7917	23.4895	24.3015
32.6922			38.3176	18.837	21.6168
35.7646			39.0272	17.4397	23.5041
29.9123			40.0002	19.1369	26.6936
30.3001			37.235	22.4361	25.8085
31.5437			36.5693	21.4119	27.0959
26.8911			28.6614	22.7433	28.8955

## Sheet: Figure 3C
Chromosome	ICSB density (number of ICSBs/100 kb)
	cen+100	100-200	200-300	300-400	400-500	500-600	600-700	>700	tel-200
1	1.5	0	0	0	0	0	0	0	0
2	1.5	1	1	0	0	0	0	0	1
3	1.5	1	0	0	0	0	0	0	0
4	1.5	0.5	0.5	0	0	0	0	0.376648	0
5	1.5	0.5	0.5	0	0	0	0	0	0
6	0	0	0	0	0	0	0	0	0
R	1	0.5	0	0	0	0	1	0	0.75

## Sheet: Figure 3D
Length of orthoblocks (bp)
CP	CD	TP
120858	372704	6669
45623	2241881	3842
158632	343262	12102
13970	5443	8391
20556	169003	6218
77103	1804397
156906	748911
29758	1365564
52233	325164
114000	28809
65186	1108163
118881	104217
26624	696562
7814	556471
14115	86930
75863	379933
36352	695686
	1200952
CP: centromere proximal; CD:centromere distal; TP: telomere proximal

## Sheet: Figure 4C
Density of IR-motif (number of IR-motifs per 1 kb DNA, in log10 scale)
C. parapsilosis		C. sojae		C. tropicalis		C. viswanathii		C. albicans		C. dubliniensis
genome	centromere	genome	centromere	genome	centromere	genome	centromere	genome	centromere	genome	centromere
0.235	0.66	0.0942946	2.14681	0.0915874	3.38253	0.125279	4.97183	0.096135	0.0747664	0.1499	0.073

## Sheet: Figure 4—figure supplement 2A
percent sequence identity
C. tropicalis				C. sojae				C. viswanathii				C. parapsilosis
LR	CC	RR	LR-RR	LR	CC	RR	LR-RR	LR	CC	RR	LR-RR	LR	CC	RR	LR-RR
89.9	38.82	89.54	98.17	88.59	39.5	79.52	97.63	91.15	85.82	93.61	98.92	72.32	40.91	61.62	91.04
92.06	39.5	90.84	96.18	87.26	43.24	80.03	95.37	88.73	87.45	88.28	87.13	80.69	51.22	63.13	91.83
95.87	75.8	89.59	99.5	87.78	41.95	80.15	98.25	88.19	88.95	88.39	99.44	57.26	36.55	60.26	78.16
88.85	68.43	92.05	95.68	89.09	39.18	80.83	98.05	92.35	92.88	92.78	99.9	69.86	43.07	49.32	63.44
90.48	38.62	88.74	97.03	87.11	37.66	81.66	97.73	88.01	83.1	87.12	96.85	55.96	35.74	60.54	65.5
90.46	41.23	91.24	98.93	93.32	39.59	79.19	98.6	90.52	84.93	89.15	99.35	56.76	37.25	60.55	67.97
89.73	78.41	89.59	97.91	93.14	75.45	87.17	99.85	89.7	87.2	89.09		57.85	34.35	61.62	59.1
90	38.32	90.28		92.99	77.39	88.82		91.48	86.52	92.18		72.85	51.13	75.1	64.25
87.34	40.17	87.27		92.98	39.96	88.22		90.41	86.27	88.99		57.36	42.82	75.18
88.97	68.44	89.14		94.79	42.59	84.84		91.34	94.01	91.02		65.04	39.19	70.03
91.97	81.64	88.07		91.71	41.27	86.21		89.27	88.15	89.45		57.84	36.26	73.71
90.7	39.66	92.47		95.13	86.13	89.67		94.67	85.8	95.18		57.9	40.37	76.04
90.3	41.85	88.85		93.93	42.98	90.54		88.18	90.83	88.48		59.25	36.33	77.48
91.9	68.99	92.23		92.81	47.78	75.32		92.03	89.73	91.79		62	44.18	75.66
90.14	78.38	89.84		90.07	44.11	92.95		88.08	85.26	88.22		63.4	39.85	71.89
90.91	38.02	89		78.54	43.14	94.82						59.65	40.71	76.74
91.75	74.87	94.22		87.02	45.4	85.92						60.86	40.39	74.79
91.38	77.16	90.06		89.87	44.13	92.55						59.71	38.88	77.34
87.89	37.53	85.54		88.24	38.31	89.02						44.64	51.57	76.26
89.64	37.91	88.3		84.64	87.83	90.96						85.04	37.02	76.95
89.56	38.35	88.78		86.99	38.62	75.51						85.24	41.3	76.52
												83.55	38.65	76.51
												43.99	36.47	73.49
												44.83	42.08	74.19
												45.15	37.67	75.22
												84.24	35.9	77.2
												82.15	34.25	77.91
												82.8	36.35	77.09
lr: left repeat; rr: right repeat; cc: central core

## Sheet: Figure 4—figure supplement 2B 
percent sequence identity
cvct_random	Ct-cv-lr	cv-ct-cc	cv-ct-rr	cvcs_random	cv-cs-lr	cv-cs-cc	cv-cs-rr	ctcs_random	ct-cs-lr	ct-cs-cc	ct-cs-rr
32.7	49.7	37.45	48.78	33.06	39.95	41.06	41.24	33.96	52.43	39.11	50.55
33.04	49.72	39.09	49.02	32.79	40.26	34.92	41.4	35.32	52.48	37.03	50.29
34.27	49.74	42.7	48.4	33.46	41.57	40.82	41.35	35.33	51.4	38.1	51.13
33.1	50.41	36.68	48.63	33.46	38.54	40.85	41.83	33.56	52.42	39.53	50.12
33.59	49.59	40.28	48.89	32.19	38.65	41.74	40.23	34.15	50.77	40.69	50.67
34.38	50.47	40.1	49.13	33.14	41.18	37.7	41.34	34.54	53.88	43.72	51.97
34.66	50.02	39.47	49.2	33.72	41.46	36.72	41.87	35.12	52.12	35.56	49.91
33.57	49.82	40.43	48.18	34.07	41.6	34.95	42.4	39.76	51.72	38.27	53.22
33.76	49.06	35.17	48.6	32.42	42.36	38.51	42.92	39.98	50.4	38.29	53
33.7	49.54	39.95	48	34	40.55	38	41.76	34.33	51.2	40.84	53.15
34.64	50.23	37.93	48.39	34.5	40.61	37.31	40.93	33.99	51.72	37.21	52.76
33.3	49.19	41.28	48.46	32.63	41.71	36.04	42.5	38.3	50.21	38.17	53.19
33.43	50.34	41.71	49.58	34.22	42.18	40.15	44.18	39.88	52.84	44.34	54.43
33.71	49.55	35.69	48.75	34.64	42.59	38.17	44.41	40.29	50.54	38.64	53.35
34.63	45.83	35.14	44.73	34.32	41.2	41.93	41.58	34.43	50.29	40.55	51.31
32.6	45.66	39.42	45.19	32.65	41.22	42.14	44.17	34.67	49.5	40.71	51.3
34.55	45.5	42.14	45.02	33.81	41.65	40.33	43.82	43.94	50.04	44.55	51.45
34.23	46.43	35.08	45.72	34.39	41.52	38.02	42.1	41.12	50.31	40.8	50.88
32.25	45.22	37.53	44.59	32.43	41.42	40.2	42.44	33.97	49.61	41.01	51.13
34.57	46.11	37.12	46.24	33.38	41.68	35.95	42.61	34.48	52.42	49.93	52.05
34.51	45.76	39.24	45.42	34.23	42.72	41.34	43.22	34.41	49.02	40.38	51.54
34.48	49.37	36.05	48.7	34.01	40.16	41.28	42.35	34.37	50.54	38.86	52.32
32.99	49.32	39.83	48.1	31.81	40.99	40.74	41.47	34.28	48.91	40.56	52.04
33.5	48.94	43.41	47.69	34.14	42.39	37.57	42.78	41.65	49.73	42.24	52.31
33.86	50.08	36.99	48.07	34.05	41.79	43.24	42.4	39.72	50	39.99	51.97
32.87	48.94	38.58	48.52	32.85	42.16	39.32	43.31	33.68	48.57	39.34	52
33.66	49.25	38	48.58	33.47	43.06	42.91	43.13	33.19	51.26	46.71	53.63
34.46	49.54	39.81	48.99	34.2	40.67	43.3	42.54	35.73	48.97	40.1	51.59
33.27	49.01	40.22	49.06	34.12	41.11	43.96	41.52	34.7	51.1	38.71	53.05
33.41	49.35	39.25	49.12	33.13	42.88	40.13	42.68	35.54	50.25	40.09	52.76
34.06	49.29	42.58	48.5	34.39	41.38	41.36	41.73	35.94	50.82	43.03	53.8
33.73	49.53	39.14	48.43	33.85	41.58	36.2	41.99	34.21	51.04	40.48	53.5
32.41	48.81	42.33	49.21	33.38	41.5	41.47	41.35	34.69	50.14	42.89	52.61
33.68	49.32	42.66	49.21	35.49	40.22	41.78	42.38	35.23	53.19	58.41	54.78
34.02	49.2	40.08	49.03	35.21	40.89	41.5	41.38	35.74	50.28	39.09	52.4
33.16	47.56	41.79	47.73	32.75	41.9	38.37	42.11	35.4	50.41	37.21	51.24
33.01	47.36	34.36	48.21	32.09	40.96	41.2	44.1	35.13	49.95	38.92	51.37
33.62	47.28	37.6	48.43	33.71	41.61	37.35	44.87	44.27	50.04	41.14	52.18
34.16	48.25	38.39	48.26	34.65	40.5	41.13	42.09	40.59	50.28	36.65	51.91
33.21	47.11	44.11	47.78	32.78	40.4	40.5	43.8	33.85	48.67	41.49	50.62
33.08	47.56	44.67	48.67	34.1	40.93	41.45	43.46	34.12	52.24	52.53	52.65
35.02	47.71	35.21	48.94	34.48	41.15	37.57	42.58	35.05	49.95	37.96	51.5
34.17				34.02				41.84	50.89	37	51.49
32.43				33.68				44.32	50.12	38.4	51.53
33.78				34.31				34.43	50.56	41.09	51.48
34.21				33.57				33.26	50.66	39.03	50.46
32.98				32.76				37.97	49.98	41.03	51.22
34.29				33.23				40.66	52.06	52.09	52.23
33.14				33.21				48.05	49.57	37.71	51.49
ct: C. tropicalis; cv: C. viswanathii; cs: C. sojae
lr: left repeat; rr: right repeat; cc: central core

## Sheet: Figure 4—figure supplement 2F
	Number of IR-motifs
	diverging	converging
cv_cen1	71	1
cv_cen2	83	6
cv_cen3	53	1
cv_cenR	65	5
cv_cen4	62	1
cv_cen6	69	2
ctcen1	38	2
ctcen2	36	2
ctcen3	36	2
ctcen4	35	2
ctcen5	41	2
ctcen6	43	4
ctcenR	41	2
cscen1	26	4
cscen2	19	2
cscen3	36	4
cscen4	21	4
cscen5	34	6
cscen6	9	4
cscenR	29	2

## Sheet: Figure 4—figure supplement 2G
	Number of IR-motifs per 250 bp
Distance from CC (kb)	Ct	Cv	Cs
0.25	0	3.33	0
0.5	0	4.33	0
0.75	0	5.33	0
1	0.57	3	0.28
1.25	5	2.17	0.28
1.5	3	1.17	0.14
1.75	0.28	0.5	3
2	0	2.33	5.86
2.25	0	0.17	3.43
2.5	0	2.67	0.43
2.75	0	1	0
3	0.43	1	0
3.25	5.71	0	0.14
3.5	5	0	0.14
3.75	0.29	0.67	0
4	0	0	0
Ct: C. tropicalis; Cv: C. viswanathii; Cs: C. sojae
